1 The climatic constrains of the historical global spread of mungbean

2

3 Pei-Wen Ong<sup>1</sup>, Ya-Ping Lin<sup>2,3</sup>, Hung-Wei Chen<sup>2</sup>, Cheng-Yu Lo<sup>2</sup>, Marina Burlyaeva<sup>4</sup>, Thomas  
4 Noble<sup>5</sup>, Ramakrishnan Nair<sup>6</sup>, Roland Schafleitner<sup>3</sup>, Margarita Vishnyakova<sup>4</sup>, Eric Bishop-von-  
5 Wettberg<sup>7,8</sup>, Maria Samsonova<sup>8</sup>, Sergey Nuzhdin<sup>9</sup>, Chau-Ti Ting<sup>10</sup>, Cheng-Ruei Lee<sup>1,2\*</sup>

6

7 1. Institute of Plant Biology, National Taiwan University, Taipei 10617, Taiwan

8 2. Institute of Ecology and Evolutionary Biology, National Taiwan University, Taipei 10617,  
9 Taiwan

10 3. World Vegetable Center Headquarter, Tainan 74199, Taiwan

11 4. Federal Research Centre All-Russian N.I. Vavilov Institute of Plant Genetic Resources (VIR),  
12 St. Petersburg, Russia

13 5. Queensland University of Technology, Brisbane, Australia

14 6. World Vegetable Center South and Central Asia, ICRISAT Campus, Patancheru, Hyderabad,  
15 Telangana 502324, India

16 7. Department of Plant and Soil Science and Gund Institute for the Environment, University of  
17 Vermont, Burlington, VT 05405, USA

18 8. Department of Applied Mathematics, Peter the Great St. Petersburg Polytechnic University, St.  
19 Petersburg, Russia

20 9. University of Southern California, Los Angeles, CA 90089, USA

21 10. Department of Life Science, National Taiwan University, Taipei 10617, Taiwan

22

23 \* Author of correspondence

24 Cheng-Ruei Lee

25 [chengrueilee@ntu.edu.tw](mailto:chengrueilee@ntu.edu.tw)

26

27

## 28 **Abstract**

29 While the domestication process has been investigated in many crops, the detailed route of  
30 cultivar range expansion and factors governing this process received relatively little attention.  
31 Here using mungbean (*Vigna radiata* var. *radiata*) as a test case, we investigated the genomes of  
32 more than one thousand accessions to illustrate climatic adaptation's role in dictating the unique  
33 cultivar spread routes in the face of continual human intervention. Despite the geographical  
34 proximity between South and Central Asia, mungbean cultivars first spread from South Asia to  
35 Southeast, East, and finally reached Central Asia. Combining evidence from demographic  
36 inference, climatic niche modeling, plant morphology, and records from ancient Chinese sources,  
37 we showed that the specific spread route was shaped by the unique combinations of climatic  
38 constraints and farmer practices across Asia, which imposed divergent selection favoring higher  
39 yield in the south but short-season and more drought-tolerant varieties in the north. Our results  
40 suggest that mungbean did not radiate from the domestication center as expected purely under  
41 human activity, but instead the spread route is highly constrained by climatic adaptation, echoing  
42 the idea that human commensals are more difficult to spread through the south-north axis of  
43 continents.

44

## 45 **Main Text**

### 46 **Introduction**

47 Crop domestication is a process where humans impose strong selection altering organisms for  
48 the suitability of cultivation or consumption. Examples include the loss of grain shattering in  
49 cereals, loss of fruit bitterness in squashes and melons, and reduced toxicity in tubers and roots,  
50 among many others (Larson et al., 2014; Meyer and Purugganan, 2013). In addition to the  
51 process of domestication, how the domesticated forms later expanded to a broader geographical  
52 area have also been detailed in several species, including maize (Matsuoka et al., 2002), rice  
53 (Huang et al., 2012), tomato (Razifard et al., 2020), chickpea (Varshney et al., 2021), and lettuce  
54 (Wei et al., 2021). However, it remains unclear whether these cultivars simply radiated from  
55 their center of domestication following human activities or whether the expansions have specific  
56 routes governed by other factors despite human influence. It is also unclear whether the

57 expansion of most crops strictly follows the longitudinal axis of the continents (Diamond, 2005)  
58 or whether or why some are able to cross different climatic zones. Using the legume crop  
59 mungbean as a test case, here we illustrate how climatic adaptation results in the unique spread  
60 route and investigate the phenotypic modifications making such spread possible.

61 Mungbean (*Vigna radiata* (L.) Wilczek var. *radiata*), also known as green gram, is an  
62 important grain legume in Asia (Nair and Schreinemachers, 2020), providing carbohydrates,  
63 protein, folate, and iron for local diets and thereby contributing to food security (Kim et al.,  
64 2015). Among pulses, mungbean is capable of tolerating moderate drought or heat stress and  
65 has a significant role in rainfed agriculture across arid and semi-arid areas (Pratap et al., 2019),  
66 which are likely to have increased vulnerabilities to climate change. Although there have been  
67 studies about the genetic diversity of cultivated and wild mungbean (Ha et al., 2021; Kang et al.,  
68 2014; Noble et al., 2018; Sangiri et al., 2007), the evolutionary history of cultivated mungbean  
69 after domestication remains unclear. Archeological studies suggest that the domestication of  
70 mungbean occurred in India, and the increase in seed size began around 1,500 BCE to 1,000  
71 BCE (Fuller, 2007, 2011; Fuller and Harvey, 2006). Using seed proteins (Tomooka et al., 1992)  
72 and isozymes (Dela Vina and Tomooka, 1994), previous studies proposed two expansion routes  
73 out of India, one in the south to Southeast Asia, and the other in the north along the silk road to  
74 China. While later studies used DNA markers to investigate mungbean population structure  
75 (Breria et al., 2020; Gwag et al., 2010; Islam and Blair, 2018; Noble et al., 2018; Sandhu and  
76 Singh, 2021; Sangiri et al., 2007), few have examined these hypothesized routes in detail.  
77 Therefore, despite evidence suggesting South Asia as the domestication origin, the existence of  
78 specific spread routes and the factors shaping specific routes remain unclear.

79 In this study, we compiled an international effort, reporting a global mungbean diversity  
80 panel of more than 1,100 accessions derived from (i) the mungbean mini-core collection of the  
81 World Vegetable Centre (WorldVeg) genebank, (ii) the Australian Diversity Panel (ADP), and  
82 (iii) the Vavilov Institute (VIR), which hosts a one-century-old collection enriched with mid-  
83 latitude Asian accessions that are underrepresented in other genebanks, some of which were old  
84 landraces collected by Nikolai I. Vavilov and his teams in the early 20<sup>th</sup> century (Burlyaeva et al.,  
85 2019). These germplasms harbor a wide range of morphological variations (Figure 1A) and  
86 constitute the most comprehensive representation of worldwide mungbean genetic variation. We

87 used this resource to investigate the global history of mungbean after domestication to reveal a  
88 spread route highly affected by climatic constraints across Asia, eventually shaping the  
89 phenotypic characteristics for local adaptation to distinct environments.

90

## 91 **Results**

### 92 **Population structure and spread of mungbean**

93 Using DArTseq, we successfully obtained new genotype data of 290 mungbean accessions from  
94 VIR (Supplementary file 1). Together with previous data (Breria et al., 2020; Noble et al., 2018),  
95 our final set included 1,108 samples with 16 wild and 1,092 cultivars. A total of 40,897 single  
96 nucleotide polymorphisms (SNPs) were obtained. Of these, 34,469 bi-allelic SNPs, with a  
97 missing rate less than 10%, were mapped on 11 chromosomes and retained for subsequent  
98 analyses. After further linkage disequilibrium (LD) filtering ( $r^2 < 0.5$ ), 10,831 LD-pruned SNPs  
99 were obtained.

100 Principal component analysis (PCA, Figure 1C) showed a triangular pattern of genetic  
101 variation among mungbean cultivars, consistent with previous studies (Breria et al., 2020; Noble  
102 et al., 2018; Sokolkova et al., 2020) and ADMIXTURE  $K=3$  (Figure 1B). The geographic  
103 distribution of these genetic groups is not random, as these three groups are distributed in South  
104 Asia (India and Pakistan), Southeast Asia (Cambodia, Indonesia, Philippines, Thailand, Vietnam  
105 and Taiwan), and more northernly parts of Asia (China, Korea, Japan, Russia, and Central Asia).  
106 As  $K$  increased, the cross-validation (CV) error decreased little after  $K = 4$  (Figure 1-figure  
107 supplement 1), where the north group could be further divided (Figure 1B). Therefore,  
108 worldwide mungbean landraces could be separated into four major genetic groups corresponding  
109 to their geography: South Asian (SA), Southeast Asian (SEA), East Asian (EA), and Central  
110 Asian (CA) groups. Interestingly, the proportion of accessions from these genetic groups is  
111 highly different among genebank collections (Figure 1D). While most un-admixed accessions  
112 from Vavilov Institute (VIR) were collected from EA and CA, the Australian Diversity Panel  
113 (ADP) was enriched for the SEA group, and the World Vegetable Center (WorldVeg) contains  
114 many SA accessions. This likely reflects the different collection efforts among genebanks and  
115 demonstrates the importance of collaboration among worldwide genebanks. Therefore, unlike

116 any other previous work in this species, this study incorporates global genetic variation among  
117 landraces of this important crop.

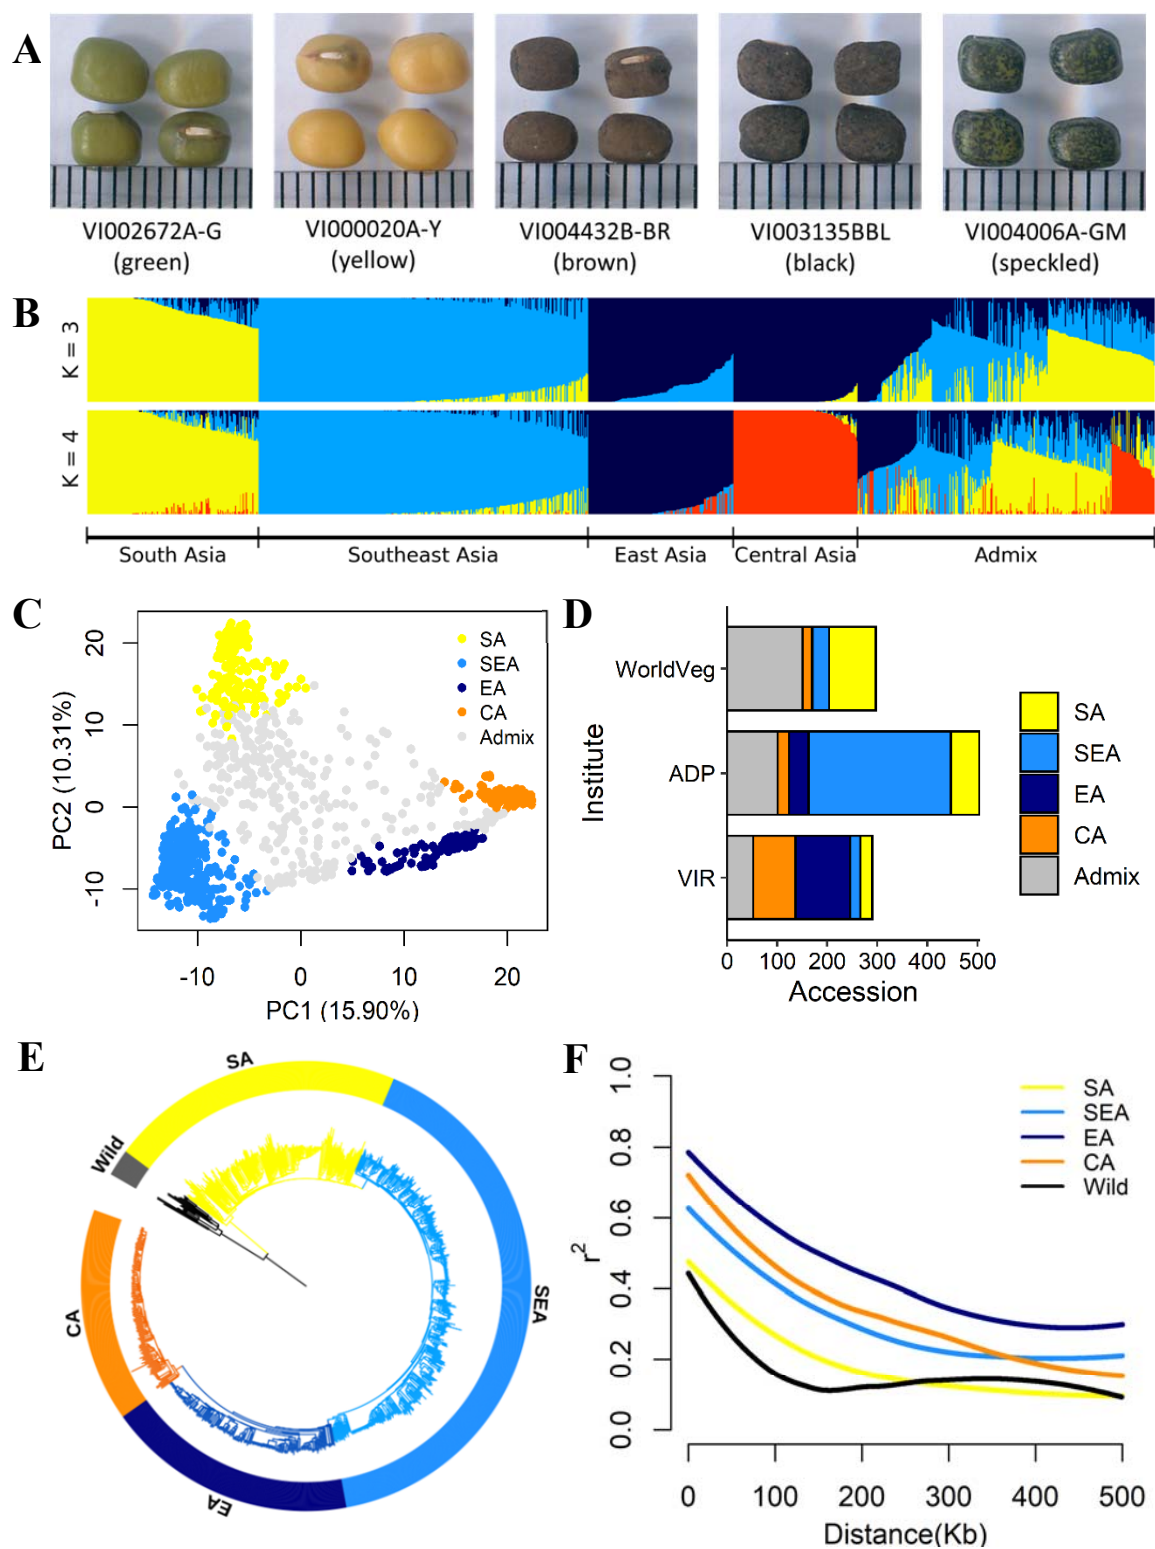

**Figure 1.** Diversity of mungbean in worldwide stock centers. (A) Variation in seed colour. (B) ADMIXTURE ancestry coefficients, where accessions were grouped by group assignments ( $Q \geq 0.7$ ). (C) Principal component analysis (PCA) plot of 1,092 cultivar accessions. Accessions were coloured based on their assignment to four inferred genetic groups ( $Q \geq 0.7$ ) while accessions with  $Q < 0.7$  were coloured gray. (D) Proportion of the four inferred genetic groups from worldwide genebanks: Vavilov Institute (VIR), Australian Diversity Panel (ADP) and World Vegetable Center (WorldVeg). (E) Neighbor-joining (NJ) phylogenetic tree of 788 accessions with  $Q \geq 0.7$  with wild mungbean as outgroup (black colour). (F) Linkage disequilibrium (LD) decay across the four inferred genetic groups.

118

119           Using wild progenitor *V. radiata* var. *sublobata* as the outgroup, the phylogenetic tree of  
120 the relatively pure (ADMIXTURE  $Q \geq 0.7$ ) accessions reveals the order of landrace evolution  
121 after domestication: The SA group first diverged from wild *sublobata*, and SEA originated from  
122 a subset of SA. A small proportion of SEA later diverged as EA, a subset of which became CA  
123 (Figure 1E). The SA-SEA-EA-CA order of landrace spread after domestication (Figure 2A) is  
124 supported by the patterns of nucleotide diversity ( $\pi$ ), which decreased from the center of origin  
125 SA ( $4.25 \times 10^{-6}$ ) to SEA ( $3.84 \times 10^{-6}$ ) and EA ( $3.06 \times 10^{-6}$ ), while the CA group has lowest  
126 diversity ( $1.95 \times 10^{-6}$ ) (Figure 2-figure supplement 1A). Pairwise  $F_{ST}$  among the four genetic  
127 groups is highest between either CA with either SA or SEA and lowest between EA and CA  
128 (Figure 2-figure supplement 1B), and outgroup  $f_3$  tests using wild *sublobata* as the outgroup  
129 suggest EA and CA to be the closest, followed by SEA and SA (Figure 2-figure supplement 1C  
130 and Supplementary file 2). LD also decays the fastest in wild *sublobata* and then the SA group  
131 (Figure 1F), followed by other cultivar groups. In summary, all analyses are consistent with our  
132 proposed order of landrace divergence.

133           Our proposed demographic history could be confounded by factors such as complex  
134 hybridization among groups. For example, SEA and CA might have independently originated  
135 from SA and later generated a hybrid population in EA (Figure 2-figure supplement 2A). Other  
136 possibilities are that either SEA or CA are the hybrid of other populations (Figure 2-figure  
137 supplement 2B, C). However, these scenarios do not fully fit the patterns we observed above. We  
138 further examined the admixture  $f_3$  statistics for all possible trios among the four groups to detect  
139 potential hybridizations. None of the tests gave significantly negative  $f_3$  values (Supplementary  
140 file 3), suggesting the lack of a strong alternative model to our proposed SA-SEA-EA-CA spread.



141 Based on the whole-genome phylogeny (Figure 1E), we used fastsimcoal2 to model the  
142 divergence time among these groups, allowing population size change and gene flow at all time  
143 points (Figure 2B). According to this model, after initial domestication, the SEA group diverged  
144 from SA at about 8.3 thousand years ago (kya) with 50% parametric bootstrap range between 6.3

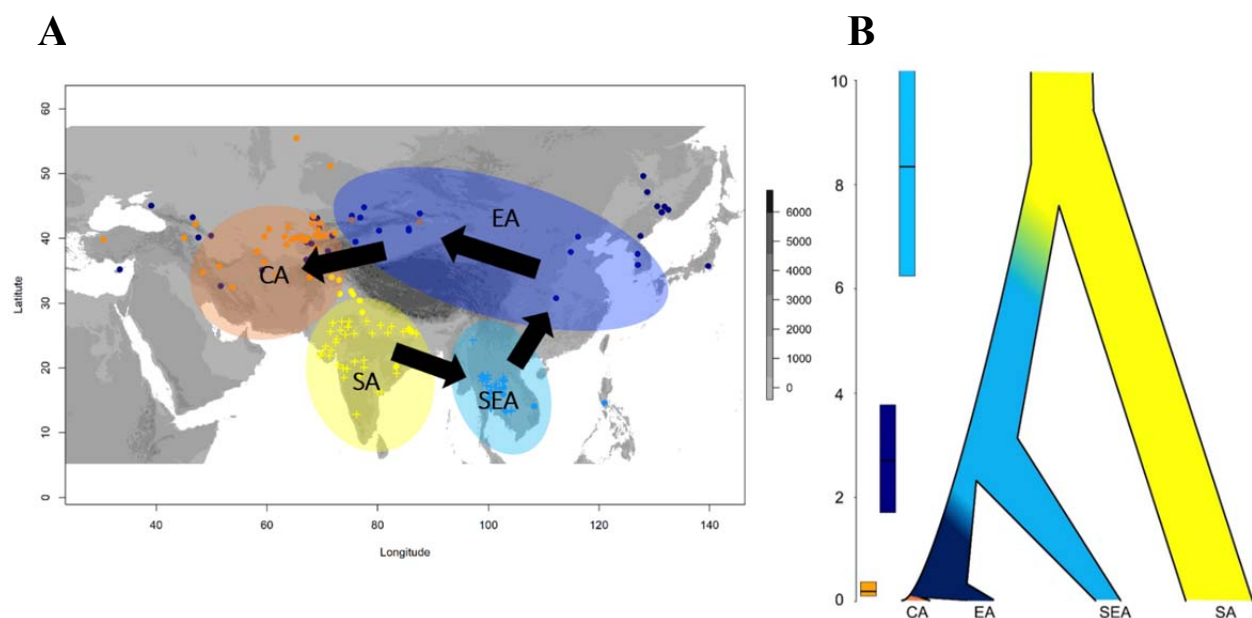

**Figure 2.** Demographic history of the four inferred genetic groups. (A) Proposed spread of mungbean from its centre of origin. The map was shaded as gray colour representing altitude (meters above sea level). Coloured circles on the map indicate the geographic distribution of each genetic group. Arrows indicates the possible expansion route. (B) Schematic model of the demographic scenario inferred by fastsimcoal2. Colored bars on the left label the 50% range of inferred divergence time of each group.

145 and 10.2 kya. Not until more than five thousand years later (2.7 kya, 50% range 1.7-3.8 kya) did  
146 EA diverge from SEA and moved north. Within a few thousand years, EA migrated west and  
147 gave rise to CA relatively recently (0.2 kya, 50% range 0.1-0.4 kya).

148

149 While populations that were established in a region for an extended time could  
150 accumulate genetic differentiation generating patterns of isolation by distance, rapid-spreading  
151 populations in newly colonized regions could not (Lee et al., 2017; The 1001 Genomes  
152 Consortium, 2016). Using this idea, Mantel's test revealed a significantly positive correlation  
153 between genetic and geographic distances for the SA genetic group ( $r = 0.463$ ,  $P = 0.015$ ),

154 followed by SEA ( $r = 0.250$ , although not as significant,  $P = 0.066$ ). No such association was  
155 found for EA ( $r = 0.032$ ,  $P = 0.141$ ) or CA ( $r = 0.053$ ,  $P = 0.257$ ). In addition, the southern  
156 groups (SA and SEA) together ( $r = 0.804$ ,  $P = 0.001$ ) have a much stronger pattern of isolation  
157 by distance than the northern groups (EA and CA,  $r = 0.325$ ,  $P = 0.001$ ) (Figure 2-figure  
158 supplement 3). These results are again consistent with our proposed order of SA-SEA-EA-CA  
159 spread as well as the divergence time estimates (Figure 2): While the southern groups (SA and  
160 SEA) existed since about 9 kya, the northern groups (EA and CA) are much younger.

161

## 162 **Environmental differentiation of the inferred genetic groups**

163 We further examined the possible causes governing the specific spread route of mungbean  
164 cultivars. Being a crop that has lost the ability of pod shattering, the spread of mungbean was  
165 governed by commerce or seed exchange, which is prevalent between South and Central Asia  
166 throughout history (see Discussion). Given that geographic barrier might not be the most  
167 important factor and these cultivars do not have the stepwise and distance-dependent dispersal  
168 patterns as in wild plants, instead of standard models of isolation by distance or resistance, we  
169 investigated whether climatic adaptation, that is, the inability of mungbean to establish in a  
170 geographic region after human-mediated long-range expansion, could be the cause.

171 Multivariate analysis of variance (MANOVA) of eight bioclimatic variables (after  
172 removing highly-correlated ones; Supplementary file 4) indicated strong differentiation in the  
173 environmental niche space of the four genetic groups (Supplementary file 5 and 6). PCA of  
174 climatic factors clearly reflects geographic structure, where the axis explaining most variation  
175 (PC1, 42%) separates north and south groups and is associated with both temperature- and  
176 precipitation-related factors (Figure 3A and Supplementary file 7). Consistent with their  
177 geographic distribution, overlaps between EA and CA and between SA and SEA was observed.  
178 Given the wide longitudinal distribution of EA, in some later analyses we separated EA into the  
179 eastern (northeast NE) and western (northwest NW) groups. Environmental niche modeling  
180 revealed distinct suitable regions of these five groups except for CA and NW, whose  
181 geographical ranges largely overlap (Figure 3B). Consistent with PCA, pairwise Schoener's D  
182 values are smallest between the northern and southern groups while largest between the eastern  
183 and western subsets within north and south (Figure 3B). Projecting their current niches to



184 paleoclimates at the mid-Holocene (about 6 kya) when Central Asia was likely wetter (Chen et  
185 al., 2008; Zhang et al., 2016), we found similar results that the SA group could not inhabit  
186 Central Asia (Figure 3-figure supplement 1). This suggests the SA-SEA-EA-CA spread of  
187 mungbean after domestication is contingent on environmental similarity.

188         While both temperature and precipitation variables differ strongly between north and  
189 south, one should note that these year-round temperature variables do not correctly reflect  
190 conditions in the growing seasons. In the north, mungbean are mostly grown in summer where  
191 the temperature is close to the south (Figure 3-figure supplement 2A-C). On the other hand,  
192 precipitation differs drastically between north and south, especially for the CA group, where the  
193 summer growing season is the driest of the year (Figure 3-figure supplement 2D). By estimating  
194 the regression slope of precipitation on geographical distance, we obtained a gradient of  
195 precipitation change per unit geographic distance between pairs of genetic groups (Figure 3C).  
196 Despite the SA-SEA transect having the steepest gradient (slope = 0.21), the spread from SA to  
197 SEA has been accompanied by an increase of precipitation and did not impose drought stress.  
198 The second highest slope (0.18), however, is associated with strong precipitation decrease if the  
199 SA group were to disperse to Central Asia. This likely explains why no direct historic spread is  
200 observed from SA to CA. Finally, our SA-SEA-EA-CA spread model posits that EA first  
201 diverged from SEA and occupied northeastern Asia followed by a westward expansion.  
202 Consistent with this model, the genetic variation of the EA group gradually declines from east to  
203 west (Figure 3D), accompanied by the gentlest decline of precipitation per unit geographic  
204 distance across Asia (Figure 3D).

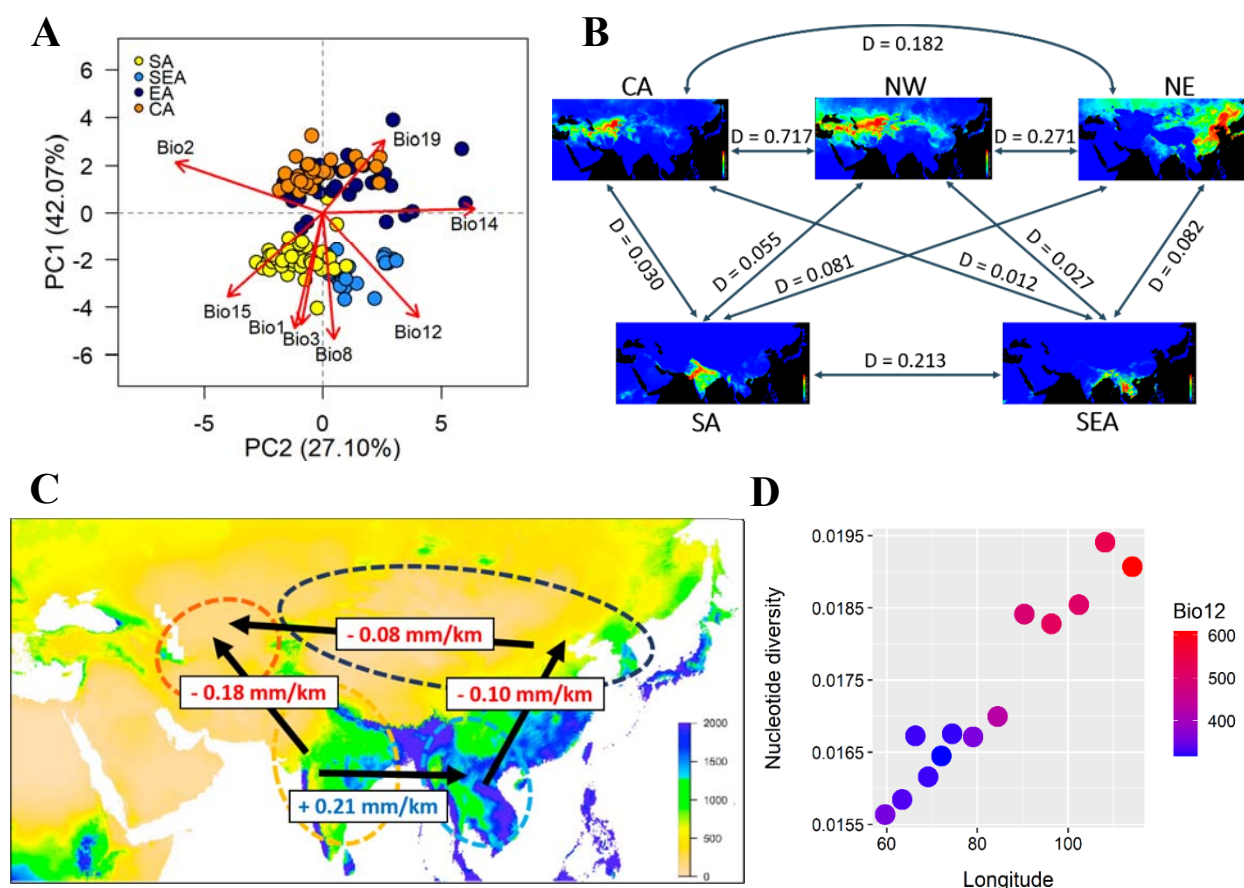

**Figure 3.** Environmental variation among genetic groups of mungbean. (A) Principal component analysis (PCA) of the eight bioclimatic variables. (B) Predicted distribution at current climate. Red colour indicates high suitability and blue indicates low suitability. Values between pairs represent niche overlap measured using Schoener's D. (C) Environmental gradient across potential directions of expansion. The value on each arrow indicates change of annual precipitation per kilometer. Background map is colored according to annual precipitation (Bio12, in mm). (D) Relationship between Bio12 and nucleotide diversity ( $\pi$ ) of East Asia genetic group across the east-west axis of Asia. Dot colors represent annual precipitation of each population.

205

## 206 Trait variation among genetic groups

207 If environmental differences, especially water availability, constrain the spread route of  
 208 mungbean, the current landraces occupying distinct environments should have locally adaptive  
 209 traits for these environments. Indeed, PCA of four trait categories show substantial differences  
 210 among genetic groups (phenology, reproductive output, and size in field trials as well as plant  
 211 weight in lab hydroponic systems, Figure 4A). In the field, CA appears to have the shortest time

212 to flowering, lowest yield in terms of seed size and pod number, and smallest leaf size (Figure  
213 4B and Supplementary file 8). On the other hand, SEA landraces maximize seed size, while SA  
214 landraces specialize in developing the largest number of pods (Figure 4B). These results suggest  
215 that CA has a shorter crop duration, smaller plant size, and less yield, consistent with drought  
216 escape phenotypes.

217 In terms of seedling response to drought stress, the  $Q_{ST}$  values of most traits (root, shoot,  
218 and whole plant dry weights under control and drought treatments) are higher than the tails of  
219 SNP  $F_{ST}$ , suggesting trait evolution driven by divergent selection (Figure 4C). Significant  
220 treatment, genetic group, and treatment by group interaction effects were observed except in a  
221 few occasions (Table 1). Consistent with field observation, SEA has largest seedling dry weight  
222 (Figure 4D). While simulated drought significantly reduced shoot dry weight for all groups, the  
223 effect on SEA is especially pronounced (treatment-by-group interaction effect,  $F_{2,575}=23.55$   $P <$   
224  $0.001$ , Table 1 and Figure 4D), consistent with its native habitats with abundant water supply  
225 (Figure 3-figure supplement 2D and Supplementary file 9). All groups react to drought in the  
226 same way by increasing root:shoot ratio (Figure 4D), suggesting such plastic change may be a  
227 strategy to reduce transpiration. Despite the lack of treatment-by-group interaction ( $F_{2,575} = 1.39$ ,  
228  $P > 0.05$ ), CA consistently exhibits significantly higher root:shoot ratio, a phenotype that is  
229 potentially adaptive to its native environment of lower water supply (Figure 3-figure supplement  
230 2D and Supplementary file 9).

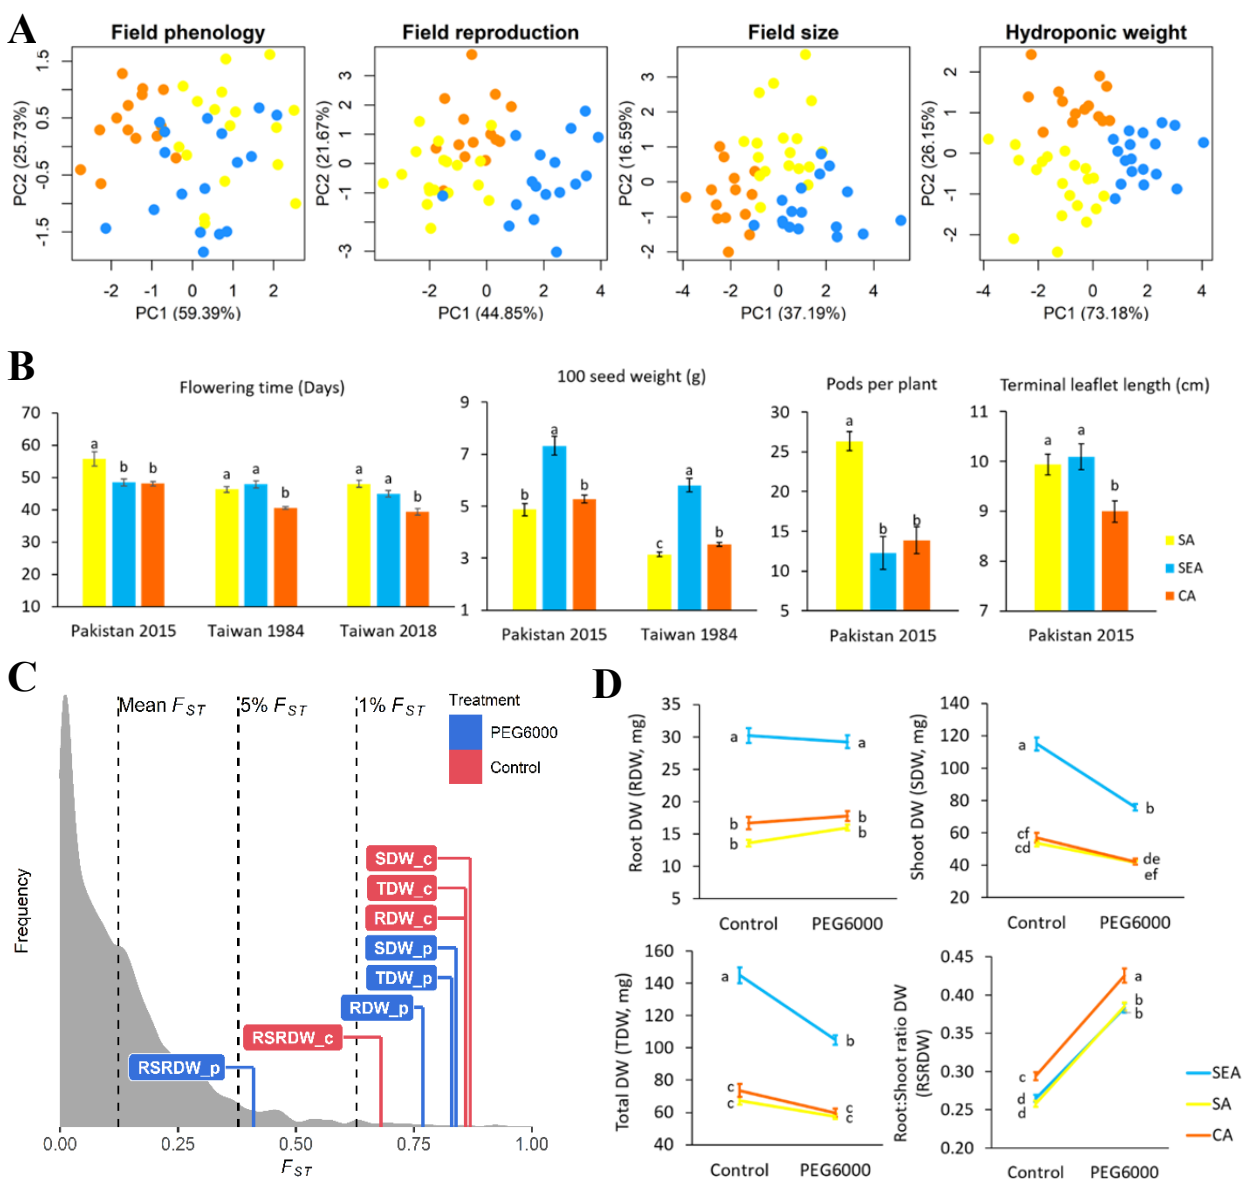

**Figure 4.** Quantitative trait differentiation among genetic groups. (A) Principal component analysis (PCA) of four trait categories. (B) Trait variability from common gardens in field experiments. (C) Comparison of  $Q_{ST}$ - $F_{ST}$  for four drought-related traits under two environments.  $F_{ST}$  values (mean, 5% and 1%) were indicated by black dashed lines. The  $Q_{ST}$  for each trait was colored according to treatment. Abbreviations: RDW: root dry weight; SDW: shoot dry weight; TDW: total dry weight; RSRDW: root:shoot ratio dry weight; c: control; p: PEG6000. (D) Effect of PEG6000 (-0.6 MPa) on root dry weight (RDW), shoot dry weight (SDW), total dry weight (TDW) and root:shoot ratio dry weight (RSRDW) among genetic groups. Data were expressed as the mean  $\pm$  standard error. In (B) and (D), lower-case letters denote significant difference under Tukey's HSD.

**Table 1.** Analysis of variance (ANOVA) *F* values for the dry weight (mg) of mungbean seedlings across three different genetic groups

232

| Source of variation       | df | RDW                  | SDW       | TDW      | RSRDW                |
|---------------------------|----|----------------------|-----------|----------|----------------------|
| Treatment                 | 1  | 2.65 <sup>n.s.</sup> | 133.26*** | 72.26*** | 978.76***            |
| Genetic group             | 2  | 60.63***             | 79.62***  | 76.54*** | 13.27***             |
| Treatment x Genetic group | 2  | 3.29*                | 23.55***  | 17.79*** | 1.39 <sup>n.s.</sup> |

(df: degrees of freedom; RDW: root dry weight; SDW: shoot dry weight; TDW: total dry weight; RSRDW: root:shoot ratio dry weight. Significance level \*  $P < 0.05$ , \*\*\*  $P < 0.001$ , n.s. non-significant)

233

### 234 **Support from ancient Chinese sources**

235 Mungbean has been occasionally mentioned in ancient Chinese sources. Here we report the  
236 records associated with our proposed mungbean spread route and the underlying mechanisms.

237 The “Classic of Poetry” (Shijing 詩經) contains poems dating between the 11<sup>th</sup> to 7<sup>th</sup> centuries

238 BCE near the lower and middle reaches of the Yellow River. While crops (especially soy bean,  
239 菽), vegetables, and many other plants have been mentioned, mungbean was not recorded. This

240 is consistent with our results that mungbean had not reached the northern parts of East Asia at

241 that time (the EA group diverged from the SEA group at around 2.6 kya), although we recognize

242 the absence of evidence does not equal the evidence of absence. The first written record of

243 mungbean in China is in an agricultural encyclopedia Qimin Yaoshu (齊民要術, 544 AD,

244 Chinese text and translation in Supplementary note), whose spatiotemporal background (~1.5

245 kya near the lower reaches of Yellow River) is again consistent with our estimated origin of the

246 EA group.

247 Regarding the phenotypic characteristics, Xiangshan Yelu (湘山野錄, 1068-1077 AD)

248 records that mungbean from South Asia (likely also includes the Southeast Asian genetic groups

249 if accessions near eastern Indian and Bangladesh were included) at that time had higher yield and

250 larger grains than native cultivars in northern China (Chinese text and translation in

251 Supplementary note). This is consistent with our results that northern accessions have lower

252 yield as a consequence of their rapid life cycle.

253           Regarding the rapid life cycle of northern accessions, Tiangong Kaiwu (天工開物, 1637  
254 AD) mentioned mungbean must be sown during July and August (Chinese text and translation in  
255 Supplementary note). This is consistent with the short-day requirement for this crop to flower:  
256 Being sown earlier, “mungbean stems would spread for meters with few pods set”, because long  
257 days inhibit flowering. Being sown later, “the plants would flower and set pods at any time, also  
258 with low yield”, as short days facilitate flowering. The record suggests that daylength  
259 requirement restricts the sowing period of mungbean in the north. Together with the dry summer  
260 (Figure 3-figure supplement 2D) and soon-arriving autumn frost, there might be strong selection  
261 favoring accessions with rapid life cycle. Therefore, the unique distribution of climatic zones in  
262 Asia resulted in not only the specific spread route but also the evolution of novel phenotypic  
263 characteristics in mungbean.

264

## 265 **Discussion**

266 Using mungbean as a test case, we combined population genomics, environmental niche  
267 modeling, empirical field and laboratory investigation, and ancient Chinese text analyses to  
268 demonstrate the importance of climatic adaptation in dictating the unique spread route of crops  
269 even after domestication.

### 270 **The climate-driven spread route of mungbean cultivars**

271 Combining divergence time estimates (Figure 2B) and niche modeling (Figure 3), our results  
272 suggest that after mungbean was domesticated in South Asia, the large environmental difference,  
273 mostly likely precipitation, strongly restricted its northwards spread to Central Asia. Supported  
274 by archaeobotanical remains from the Thai-Malay Peninsula date to ca. 400-100 BCE (Castillo,  
275 2019; Castillo et al., 2016), mungbean first spread to Southeast Asia where the environment is  
276 more benign during the Holocene Climate Optimum, but it took about six thousand years until  
277 mungbean further spread to northeast Asia due to the environmental difference, consistent with  
278 historical records from China. In rice, the climate cooling that started at about 4.2 kya is  
279 associated with the divergence of the temperate *japonica* from tropical *japonica* (Gutaker et al.,  
280 2020). The 50% confidence range of our SEA-EA divergence (1.7-3.8 kya) happened after that,  
281 and we noticed this is the period when cooling was slightly attenuated (Marcott et al., 2013),



282 suggesting climate change might also be associated with the northward expansion of mungbean.  
283 After that, the EA group spread across the northern part of Asia within a few thousand years. Our  
284 proposed route suggests mungbean reached Central Asia at the latest, consistent with its absence  
285 from archeological sites in Central Asia (Kazakhstan, Uzbekistan, and Turkmenistan) during the  
286 Bronze and Iron Ages (Miller, 1999; Spengler et al., 2017) and the medieval period (800-1100  
287 AD) (Spengler et al., 2018). Consistently, the history of Central Asia suggests mungbean likely  
288 appeared in this region from the late 18<sup>th</sup> to the early 19<sup>th</sup> century (Annanepesov and Bababekov,  
289 2003).

### 290 **The effect of human activities and distinct regional usages of mungbean**

291 In this study, we suggest that geographic barriers (such as the Hindu Kush mountains) may not  
292 be an essential factor restricting mungbean spread from SA to CA. Mungbean cultivars have lost  
293 the natural ability of pod shattering to disperse seeds, and they mostly traveled through  
294 landscapes by human-mediated seed exchange or commerce. As early as about 4 kya, the  
295 Bactria–Margiana Archaeological Complex (BMAC) civilization north of the Hindu Kush had  
296 extensive contact with the Indus Valley. Despite this, temperate crops were mostly found in  
297 archeological sites there (Jeong et al., 2019). The travels between Central and South Asia had  
298 also been made by the Aryans, Alexander the Great, and later frequently through the silk road,  
299 and empires such as Kushan and Mughal had their territories covering both sides of Hindu Kush,  
300 suggesting it was not a barrier for human. In the Chinese language, crop names starting with the  
301 character 胡 (Hu, meaning northwestern tribes) refer to those introduced from Central Asia.

302 While mungbean (綠豆, meaning green bean) does not bear such a name, several presumably  
303 India-originated crops do, such as pepper (胡椒), cucumber (胡瓜), and sesame (胡麻),  
304 suggesting it is still possible for India-originated crops to spread to East Asia through Central  
305 Asia.

306 Despite the profound impact of human-mediated dispersal on the spread of these and  
307 many other crops (Herniter et al., 2020; Kistler et al., 2018), in mungbean we suggest adaptation  
308 to distinct climatic regimes to be an important factor in the establishment after dispersal.  
309 Compared with other crops, mungbean might not be a highly valued crop under extensive care

310 during cultivation. Indeed, the earliest record of mungbean in China (Qimin Yaoshu 齊民要術,  
311 544 AD) emphasizes its use as green manure. In Central Asia, mungbean is a minor crop (Rani et  
312 al., 2018) grown with little input, only in the short duration between successive planting of main  
313 crops and using residual soil moisture with little irrigation. We suggest that the lack of extensive  
314 input subjects mungbean to more substantial local climatic challenges than highly valued high-  
315 input crops that receive intensive management, including irrigation. Therefore, the combination  
316 of climatic constraints and cultural usage, instead of physical barriers, may have shaped the  
317 historical spread route of mungbean despite extensive human activities across the Hindu Kush.

318 In addition to the constraint of soil moisture, other factors may have contributed to the  
319 selection for short-season accessions in the north. In the short summer seasons of much of  
320 Central Asia, short crop cycling is a requirement. In Uzbekistan, mungbean is often sown in  
321 early July after the winter wheat season and harvested before mid-October to avoid delays in the  
322 next round of winter wheat and escape frost damage. Therefore, fast-maturing accessions are  
323 essential for this production system (Rani et al., 2018). Similar rotation systems using mungbean  
324 to restore soil fertility during the short summer season after the harvest of the main crop were  
325 also mentioned in ancient Chinese sources (Chen, 1980). Mungbean is a short-day species from  
326 the south, and day length likely limits the window when mungbean could be grown in the north:  
327 Chinese texts during the 17<sup>th</sup> century (Tiangong Kaiwu 天工開物, 1637 AD) specifically  
328 mentioned the suitable duration to sow mungbean to control the flowering behavior for  
329 maximum yield (Supplementary note). Therefore, unlike in the south where yield appears to be  
330 an important selection target, the unique combination of day length, agricultural practices, soil  
331 water availability, and frost damage in the north requires the selection for short-season  
332 accessions, likely limiting the direct adoption of southern cultivars in the north.

333

## 334 **Conclusion**

335 Our study demonstrates that mungbean's range expansion after domestication is associated with  
336 climatic conditions, which shaped the genetic diversity and contributed to adaptive  
337 differentiation among genetic groups. The climatic differences likely also resulted in farmers'  
338 differential emphasis on using it mainly as a grain or green manure crop, further intensifying the

339 phenotypic diversification among regional cultivars. Therefore, this collection and the  
340 investigation of global landraces adapted to diverse environments is an invaluable genetic  
341 resource for the genetic improvement of mungbean. Our results further echo the notion in  
342 popular science (Diamond, 2005) and previous research (Lee et al., 2017) that human  
343 commensals are more prone to east-west longitudinal spread rather than north-south latitudinal  
344 expansion due to environmental constraints.

345

## 346 **Materials and Methods**

### 347 **Plant materials and SNP genotyping**

348 A total of 290 cultivated mungbean (*V. radiata* var. *radiata*) accessions were provided by the  
349 Vavilov Institute (VIR). Most of the landraces collected during 1910-1960 are considered the  
350 oldest mungbean collection from VIR (Burlyaeva et al., 2019). The complete list of material can  
351 be found in Supplementary file 1. Genomic DNA was extracted from a single plant per accession  
352 using QIAGEN Plant Mini DNA kit according to the manufacturer's instruction with minor  
353 modification. DNA samples were sent to Diversity Arrays Technology Pty Ltd, Canberra,  
354 Australia for diversity array technology sequence (DArTseq) genotyping.

355 DArTseq data of 521 accessions from the Australian Diversity Panel (ADP) (Noble et al.,  
356 2018) and 297 accessions from the World Vegetable Center (WorldVeg) mini-core (Breria et al.,  
357 2020) were also included in this study. In total, our dataset contains more than one thousand  
358 accessions (1092) and covers worldwide diversity of mungbean representing a wide range of  
359 variation in seed colour (Figure 1A). Sixteen wild mungbean (*V. radiata* var. *sublobata*)  
360 accessions were included as an outgroup.

361 The major goal of this study is to investigate the patterns of population expansion and the  
362 underlying ecological causes instead of detailed haplotype analyses of specific genomic regions.  
363 For this goal, genomewide SNPs provide similar information as whole-genome sequencing, as  
364 have been shown in other species. Compared to other genotyping-by-sequencing technologies,  
365 DArTseq has the additional advantage of less missing data among loci or individuals, providing  
366 more robust estimation of population structure.

367

## 368 **SNP calling**

369 Trimmomatic version 0.38 (Bolger et al., 2014) was used to remove adapters based on the  
370 manufacturer's adapter sequences. Reads for each accession were trimmed for low-quality bases  
371 with quality scores of  $Q \leq 10$  using SolexaQA version 3.1.7.1 (Cox et al., 2010) and mapped to  
372 the mungbean reference genome (Vradiata\_ver6, Kang et al., 2014) using the Burrows-Wheeler  
373 Aligner (BWA) version 0.7.15 (Li and Durbin, 2009). Reads were then sorted and indexed using  
374 samtools version 1.4.1 (Li et al., 2009). SNPs were called using Genome Analysis Toolkit  
375 (GATK) version 3.7-0-gcfedb67 (McKenna et al., 2010). SNPs with more than two alleles and  
376 10% missing data were removed using VCFtools version 0.1.13 (Danecek et al., 2011). To  
377 reduce SNP redundancy caused by linkage disequilibrium (LD), SNPs were pruned based on a  
378 50-SNP window with a step of 5 SNPs and  $r^2$  threshold of 0.5 in PLINK (Purcell et al., 2007).

379

## 380 **Population genetics and differentiation analyses**

381 Population structure was investigated using ADMIXTURE (Alexander et al., 2009) with the  
382 number of clusters (K) ranging from 1 to 10. The analyses were run ten times for each K value,  
383 and cross-validation (CV) error was used to obtain the most probable K value for population  
384 structure analysis. ADMIXTURE plots were generated using "Pophelper" in R (Francis, 2017).

385 Genetic groups of accessions were assigned based on ancestry coefficient  $Q \geq 0.7$ ,  
386 otherwise the accession was considered admixed. The population structure was also examined  
387 with principal component analysis (PCA). The neighbor-joining phylogenetic tree was calculated  
388 using TASSEL (Trait Analysis by aSSociation, Evolution and Linkage) software version 5.2.60  
389 (Bradbury et al., 2007) and visualized using FigTree version 1.4.4  
390 (<http://tree.bio.ed.ac.uk/software/figtree/>). For each genetic group, nucleotide diversity ( $\pi$ ) was  
391 estimated with 300 kb sliding windows and a step size of 10 kb using VCFtools version 0.1.13  
392 (Danecek et al., 2011) and genetic differentiation ( $F_{ST}$ ) between groups was calculated  
393 accordingly. The calculation was based on SNP markers with minor allele frequency,  $MAF \geq$   
394 0.05. LD decay for each genetic group was estimated using PopLDdecay (Zhang et al., 2019).  
395 The curves were fitted by a LOESS function and an LD decay plot was drawn using R.

396 To examine the role of geographic distance in shaping spatial genetic differentiation,  
397 Mantel tests with 1,000 permutations were performed separately for the four genetic groups  
398 using “ade4” in R. Pairwise genetic distance between accessions was estimated using “StAMPP”  
399 in R while the great circle geographic distance was determined using “fields” in R.

400  $f_3$  statistics was computed using ADMIXTOOLS version 7.0 (Patterson et al., 2012), as  
401 implemented in the “admixtools” in R. The statistic compares allele frequencies in two potential  
402 source populations (A, B) and a target population C. A negative value of  $f_3$  indicates that the C is  
403 admixed of A and B. The Z-score  $< -3$  was considered to be statistically significant. The  
404 estimated  $f_3$  statistics was further used to construct the topology of an admixture graph.

405 Based on the shape of the phylogenetic tree, we used fastsimcoal2 (Excoffier et al., 2021;  
406 Excoffier and Foll, 2011), which does not rely on whole-genome sequencing, to estimate the  
407 split time among genetic groups. Fifty accessions were randomly picked from each genetic group.  
408 Population size was allowed to change, and gene flow was allowed among populations. This  
409 analysis used all sites (67K sites) covered by the DArT tags (including monomorphic sites), and  
410 the mutation rate was set to  $1 \times 10^{-8}$ , assuming one generation per year. The model was run  
411 independently 100 times, each with 100,000 simulations. After obtaining the run with the highest  
412 likelihood, we performed parametric bootstrapping 100 times to obtain the confidence interval of  
413 each parameter as described in the fastsimcoal2 manual.

414

#### 415 **Ecological niche modelling (ENM)**

416 Climate data for conditions between 1960-1990 were downloaded from the WORLDCLIM 1.4  
417 database (Hijmans et al., 2005), which included monthly minimum, maximum, mean  
418 temperature, precipitation, and 19 bioclimatic variables. All climatic variables of accession  
419 collection sites were extracted. To reduce redundancy and minimize high correlations, pairwise  
420 Pearson correlations between the 19 bioclimatic variables were calculated using ENMTools  
421 version 1.4.4 (Warren et al., 2010), excluding one of the two variables that has a correlation  
422 above 0.8 (Supplementary file 4). As a result, eight bioclimatic variables were used for all further  
423 analyses including Bio1 (annual mean temperature), Bio2 (mean diurnal range), Bio3  
424 (isothermality), Bio8 (mean temperature of wettest quarter), Bio12 (annual precipitation), Bio14

425 (precipitation of driest month), Bio15 (precipitation seasonality) and Bio16 (precipitation of  
426 coldest month). PCA and multivariate analysis of variance (MANOVA) were conducted to  
427 examine whether there was significant habitat difference among genetic groups. Ecological niche  
428 modelling (ENM) was performed using MAXENT version 3.3.1 (Phillips et al., 2006) to predict  
429 the geographic distribution of suitable habitats for cultivated mungbean.

430 To understand whether the habitats of genetic groups are differentiated, 248 sampling  
431 sites (82 for East Asia, 45 for Southeast Asia, 49 for South Asia and 72 for Central Asia genetic  
432 groups), in combination with additional presence records obtained from the Global Biodiversity  
433 Information Facility (GBIF, <https://www.gbif.org/>), were used for the analysis. The ENM  
434 analysis was run with random seed, a convergence threshold of 5,000 and 10-fold cross-  
435 validation. As a measure of the habitat overlaps of the four genetic groups, pairwise of  
436 Schoener's D was calculated using ENMTools. The value ranges from 0 (no niche overlap) to 1  
437 (niche complete overlap).

438

### 439 **Drought phenotyping**

440 A total of 52 accessions with ancestry coefficients  $Q \geq 0.7$  from three genetic groups  
441 (Southeast Asia, South Asia and Central Asia) were selected for experiments of seedling-stage  
442 drought response. The experiment was laid out in a completely randomized design with three  
443 replicates of each accession under two treatments (control/drought). The experiment was  
444 conducted in two independent batches, and the whole experiment included 624 plants (52  
445 accessions x 2 treatments x 3 plants per treatment x 2 batches).

446 Mungbean seeds were surface-sterilized with 10% bleach for 10 mins and rinsed with  
447 distilled water for three times. Seeds were further treated with 70% ethanol for 5 mins and  
448 washed three times in distilled water. Sterilized seeds were placed on wet filter paper in petri  
449 dishes for germination. The experiment was conducted in a 740FLED-2D plant growth chamber  
450 (HiPoint, Taiwan) at temperature of  $25 \pm 1^\circ\text{C}$  and 12 hours of photoperiod (light ratios of red:  
451 green: blue 3: 1: 1) with light intensity  $350 \mu\text{mol m}^{-2}\text{s}^{-1}$  and relative humidity at  $60 \pm 5\%$ . After  
452 three days of germination, the seedling was transplanted to a hydroponic system with half-  
453 strength Hoagland nutrient solution (Phytotechnologies Laboratories, USA). The nutrient



454 solution was changed on alternate days and the pH of the solution was adjusted to 6.0 with 1M  
455 KOH or 1M HCl.

456 Plants were grown in the nutrient solution for six days and exposed to treatments of  
457 drought or control (in the same nutrient solution). The drought stress simulated osmotic potential  
458 (-0.6 MPa) by adding PEG6000 (polyethylene glycol, Sigma-Aldrich, Germany) to the nutrient  
459 solution according to Michel and Kaufmann (1973).

460 After five days of PEG6000 treatment, samples were evaluated for shoot dry weight  
461 (SDW) and root dry weight (RDW), measured on digital balance after oven-drying at 70°C for  
462 48 hours. All traits were analysed by mixed-model analysis of variance (ANOVA) with the  
463 treatment (control/drought) and genetic group as fixed effects. The models included accessions  
464 as a random effect nested within genetic groups and a random effect of batches. Tukey's test was  
465 conducted to compare genetic groups. All statistics were performed using JMP v3.0.0 (SAS  
466 Institute, 2016).

467

#### 468 **$Q_{ST}$ - $F_{ST}$ comparisons**

469 For each trait, quantitative trait divergence ( $Q_{ST}$ ) was calculated separately with respect to each  
470 treatment. Variance components were estimated using a model with genetic groups, accessions  
471 nested within genetic groups and batches as random factors. Since mungbean is a predominantly  
472 self-pollinated species,  $Q_{ST}$  was calculated based on Neji et al. (2015) as  $\sigma_p^2 / (\sigma_p^2 + \sigma_w^2)$ , where  
473  $\sigma_p^2$  and  $\sigma_w^2$  represent the variance among and within genetic groups, respectively. The  $F_{ST}$  was  
474 calculated only using accessions in the phenotyping experiment.

475

#### 476 **Field evaluation**

477 Among the 52 accessions used for laboratory experiments, phenotyping of 49 accessions was  
478 conducted at WorldVeg, Taiwan in 1984 and 2018 and at Crop Sciences Institute, National  
479 Agricultural Research Centre, Pakistan in 2015. The traits related to phenology (days to 50%  
480 flowering), reproduction (100 seed weight, pod length, pods per plant, 1000 seed weight, seeds  
481 yield per plant, and seeds per pod), and plant size (petiole length, plant height, plant height at

482 flowering, plant height at maturity, primary leaf length, primary leaf width, terminal leaflet  
483 length, and terminal leaflet width) were included. Trait values were inverse normal transformed.  
484 The ANOVA was performed to test for inferred genetic groups differences for each trait using R  
485 software (version 4.1.0).

486

## 487 **Acknowledgements**

488 We thank Chia-Yu Chen and Shang-Ying Tien for assistance in sample preparation. C-RL was  
489 funded by 107-2923-B-002-004-MY3 and 110-2628-B-002-027 from the Ministry of Science  
490 and Technology, Taiwan. C-TT was funded by 107-2923-B-002-004-MY3 from the Ministry of  
491 Science and Technology, Taiwan. Y-PL was supported by 110-2313-B-125-001-MY3 from the  
492 Ministry of Science and Technology, Taiwan. RN and RS were funded by the Australian Center  
493 for International Agricultural Research (ACIAR) through the projects on International Mungbean  
494 Improvement Network (CIM-2014-079 and CROP-2019-144) and by the strategic long-term  
495 donors to the World Vegetable Center: Republic of China (Taiwan), UK aid from the UK  
496 government, United States Agency for International Development (USAID), Germany, Thailand,  
497 Philippines, Korea, and Japan. EBvW was supported by USDA Multistate Hatch NE1710.  
498 EBvW and MS were supported by Russian Scientific Fund Project No. 18-46-08001 and the  
499 Ministry of Science and Higher Education of the Russian Federation as part of World-class  
500 Research Center program: Advanced Digital Technologies (contract No. 075-15-2020-934 dated  
501 17.11.2020). SN was supported by the Zumberge foundation.

502

## 503 **Data Availability**

504 Sequences generated in this study are available under NCBI BioProject PRJN809503. Accession  
505 names, GPS coordinates, and NCBI accession numbers of the Vavilov Institute accessions are  
506 available under Supplementary file 1. Plant trait data are available at Dryad  
507 <https://doi.org/10.5061/dryad.d7wm37q3h>. Sequences and accession information of the World  
508 Vegetable Centre mini-core and the Australian Diversity Panel collections were obtained from  
509 Breria et al. (2020) and Noble et al. (2018).

510

511 **References**

- 512 Alexander DH, Novembre J, Lange K. 2009. Fast model-based estimation of ancestry in  
513 unrelated individuals. *Genome research* **19**:1655-1664. DOI:  
514 <https://doi.org/10.1101/gr.094052.109>
- 515 Annanepesov M, Bababekov HN. 2003. The khanates of khiva and kokand and the relations  
516 between the knanates and with other powers. In: Adle C, Habib I (Eds). *History of*  
517 *Civilizations of Central Asia, Volume 5: Development in Contrast, from the Sixteenth to*  
518 *the mid-Nineteenth Century*. Paris: UNESCO Publishing. p. 64-89.
- 519 Bolger AM, Lohse M, Usadel B. 2014. Trimmomatic: a flexible trimmer for Illumina sequence  
520 data. *Bioinformatics* **30**:2114-2120. DOI: <https://doi.org/10.1093/bioinformatics/btu170>
- 521 Bradbury PJ, Zhang Z, Kroon DE, Casstevens TM, Ramdoss Y, Buckler ES. 2007. TASSEL:  
522 software for association mapping of complex traits in diverse samples. *Bioinformatics*  
523 **23**:2633-2635. DOI: <https://doi.org/10.1093/bioinformatics/btm308>
- 524 Breria CM, Hsieh CH, Yen J-Y, Nair R, Lin C-Y, Huang S-M, Noble TJ, Schafleitner R. 2020.  
525 Population structure of the world vegetable center mungbean mini core collection and  
526 genome-wide association mapping of loci associated with variation of seed coat luster.  
527 *Tropical Plant Biology* **13**:1-12. DOI: <https://doi.org/10.1007/s12042-019-09236-0>
- 528 Burlyayeva M, Vishnyakova M, Gurkina M, Kozlov K, Lee C-R, Ting C-T, Schafleitner R,  
529 Nuzhdin S, Samsonova M, von Wettberg E. 2019. Collections of mungbean [*Vigna*  
530 *radiata* (L.) R. Wilczek] and urdbean [*V. mungo* (L.) Hepper] in Vavilov Institute (VIR):  
531 traits diversity and trends in the breeding process over the last 100 years. *Genetic*  
532 *Resources and Crop Evolution* **66**:767-781. DOI: [https://doi.org/10.1007/s10722-019-](https://doi.org/10.1007/s10722-019-00760-2)  
533 [00760-2](https://doi.org/10.1007/s10722-019-00760-2)
- 534 Castillo CC. 2019. Preservation bias: is rice overrepresented in the archaeological record?  
535 *Archaeological and Anthropological Sciences* **11**:6451-6471. DOI:  
536 <https://doi.org/10.1007/s12520-018-0717-4>
- 537 Castillo CC, Bellina B, Fuller DQ. 2016. Rice, beans and trade crops on the early maritime Silk  
538 Route in Southeast Asia. *Antiquity* **90**:1255-1269. DOI:  
539 <https://doi.org/10.15184/aqy.2016.175>

- 540 Chen F, Yu Z, Yang M, Ito E, Wang S, Madsen DB, Huang X, Zhao Y, Sato T, John B. Birks H,  
541 Boomer I, Chen J, An C, Wünnemann B. 2008. Holocene moisture evolution in arid  
542 central Asia and its out-of-phase relationship with Asian monsoon history. *Quaternary*  
543 *Science Reviews* **27**:351-364. DOI: <https://doi.org/10.1016/j.quascirev.2007.10.017>
- 544 Chen L-T. 1980. A study of the systems of rotating crops in Chinese history 我國歷代輪種制度  
545 之研究. *Bulletin of the Institute of History and Philology* **51**:281-313.
- 546 Cox MP, Peterson DA, Biggs PJ. 2010. SolexaQA: At-a-glance quality assessment of Illumina  
547 second-generation sequencing data. *BMC bioinformatics* **11**:485. DOI:  
548 <https://doi.org/10.1186/1471-2105-11-485>
- 549 Danecek P, Auton A, Abecasis G, Albers CA, Banks E, DePristo MA, Handsaker RE, Lunter G,  
550 Marth GT, Sherry ST, McVean G, Durbin R. 2011. The variant call format and VCFtools.  
551 *Bioinformatics* **27**:2156-2158. DOI: <https://doi.org/10.1093/bioinformatics/btr330>
- 552 Dela Vina AC, Tomooka N. 1994. Genetic diversity in mungbean [*Vigna radiata* (L.) Wilczek]  
553 based on two enzyme systems. *Philippine Journal of Crop Science* **19**:1-9.
- 554 Diamond JM. 2005. *Guns, Germs, and Steel: The Fates of Human Societies*. New York: Norton.
- 555 Excoffier L, Marchi N, Marques DA, Matthey-Doret R, Gouy A, Sousa VC. 2021. fastsimcoal2:  
556 demographic inference under complex evolutionary scenarios. *Bioinformatics* **37**:4882-  
557 4885. DOI: <https://doi.org/10.1093/bioinformatics/btab468>
- 558 Excoffier L, Foll M. 2011. fastsimcoal: a continuous-time coalescent simulator of genomic  
559 diversity under arbitrarily complex evolutionary scenarios. *Bioinformatics* **27**:1332-1334.  
560 DOI: <https://doi.org/10.1093/bioinformatics/btr124>
- 561 Francis RM. 2017. pophelper: an R package and web app to analyse and visualize population  
562 structure. *Molecular ecology resources* **17**:27-32. DOI: [https://doi.org/10.1111/1755-  
563 0998.12509](https://doi.org/10.1111/1755-0998.12509)
- 564 Fuller DQ. 2007. Contrasting patterns in crop domestication and domestication rates: recent  
565 archaeobotanical insights from the old world. *Annals of botany* **100**:903-924. DOI:  
566 <https://doi.org/10.1093/aob/mcm048>
- 567 Fuller DQ. 2011. Finding plant domestication in the Indian subcontinent. *Current Anthropology*  
568 **52**:S347-S362. DOI: <https://doi.org/10.1086/658900>

- 569 Fuller DQ, Harvey EL. 2006. The archaeobotany of Indian pulses: identification, processing and  
570 evidence for cultivation. *Environmental Archaeology* **11**:219-246. DOI:  
571 <https://doi.org/10.1179/174963106x123232>
- 572 Gutaker RM, Groen SC, Bellis ES, Choi JY, Pires IS, Bocinsky RK, Slayton ER, Wilkins O,  
573 Castillo CC, Negrão S, Oliveira MM, Fuller DQ, Guedes JAdA, Lasky JR, Purugganan  
574 MD. 2020. Genomic history and ecology of the geographic spread of rice. *Nature plants*  
575 **6**:492-502. DOI: <https://doi.org/10.1038/s41477-020-0659-6>
- 576 Gwag J-G, Dixit A, Park Y-J, Ma K-H, Kwon S-J, Cho G-T, Lee G-A, Lee S-Y, Kang H-K, Lee  
577 S-H. 2010. Assessment of genetic diversity and population structure in mungbean. *Genes*  
578 *& genomics* **32**:299-308. DOI: <https://doi.org/10.1007/s13258-010-0014-9>
- 579 Ha J, Satyawati D, Jeong H, Lee E, Cho K-H, Kim MY, Lee S-H. 2021. A near-complete  
580 genome sequence of mungbean (*Vigna radiata* L.) provides key insights into the modern  
581 breeding program. *The plant genome* **14**:e20121. DOI:  
582 <https://doi.org/10.1002/tpg2.20121>
- 583 Herniter IA, Muñoz-Amatriáin M, Close TJ. 2020. Genetic, textual, and archeological evidence  
584 of the historical global spread of cowpea (*Vigna unguiculata* [L.] Walp.). *Legume*  
585 *Science* **2**:e57. DOI: <https://doi.org/10.1002/leg3.57>
- 586 Hijmans RJ, Cameron SE, Parra JL, Jones PG, Jarvis A. 2005. Very high resolution interpolated  
587 climate surfaces for global land areas. *International Journal of Climatology* **25**:1965-  
588 1978. DOI: <https://doi.org/10.1002/joc.1276>
- 589 Huang X, Kurata N, Wei X, Wang Z-X, Wang A, Zhao Q, Zhao Y, Liu K, Lu H, Li W, Guo Y,  
590 Lu Y, Zhou C, Fan D, Weng Q, Zhu C, Huang T, Zhang L, Wang Y, Feng L, Furuumi H,  
591 Kubo T, Miyabayashi T, Yuan X, Xu Q, Dong G, Zhan Q, Li C, Fujiyama A, Toyoda A,  
592 Lu T, Feng Q, Qian Q, Li J, Han B. 2012. A map of rice genome variation reveals the  
593 origin of cultivated rice. *Nature* **490**:497-501. DOI: <https://doi.org/10.1038/nature11532>
- 594 Islam ASMF, Blair MW. 2018. Molecular characterization of mung bean germplasm from the  
595 USDA core collection using newly developed KASP-based SNP markers. *Crop Science*  
596 **58**:1659-1670. DOI: <https://doi.org/10.2135/cropsci2018.01.0044>
- 597 Jeong C, Balanovsky O, Lukianova E, Kahbatkyzy N, Flegontov P, Zaporozhchenko V, Immel  
598 A, Wang C-C, Ixan O, Khussainova E, Bekmanov B, Zaibert V, Lavryashina M,  
599 Pocheshkhova E, Yusupov Y, Agdzhoyan A, Koshel S, Bukin A, Nymadawa P,

- 600 Turdikulova S, Dalimova D, Churnosov M, Skhalyakho R, Daragan D, Bogunov Y,  
601 Bogunova A, Shtrunov A, Dubova N, Zhabagin M, Yepiskoposyan L, Churakov V,  
602 Pislegin N, Damba L, Saroyants L, Dibirova K, Atramentova L, Utevska O, Idrisov E,  
603 Kamenshchikova E, Evseeva I, Metspalu M, Outram AK, Robbeets M, Djansugurova L,  
604 Balanovska E, Schiffels S, Haak W, Reich D, Krause J. 2019. The genetic history of  
605 admixture across inner Eurasia. *Nature ecology & evolution* **3**:966-976. DOI:  
606 <https://doi.org/10.1038/s41559-019-0878-2>
- 607 Kang YJ, Kim SK, Kim MY, Lestari P, Kim KH, Ha BK, Jun TH, Hwang WJ, Lee T, Lee J,  
608 Shim S, Yoon MY, Jang YE, Han KS, Taeprayoon P, Yoon N, Somta P, Tanya P, Kim  
609 KS, Gwag JG, Moon JK, Lee YH, Park BS, Bombarely A, Doyle JJ, Jackson SA,  
610 Schafleitner R, Srinives P, Varshney RK, Lee SH. 2014. Genome sequence of mungbean  
611 and insights into evolution within Vigna species. *Nature communications* **5**:5443. DOI:  
612 <https://doi.org/10.1038/ncomms6443>
- 613 Kim SK, Nair RM, Lee J, Lee SH. 2015. Genomic resources in mungbean for future breeding  
614 programs. *Frontiers in Plant Science* **6**:626. DOI:  
615 <https://doi.org/10.3389/fpls.2015.00626>
- 616 Kistler L, Maezumi SY, Souza JGd, Przelomska NAS, Costa FM, Smith O, Loiselle H, Ramos-  
617 Madrigal J, Wales N, Ribeiro ER, Morrison RR, Grimaldo C, Prous AP, Arriaza B,  
618 Gilbert MTP, Freitas FdO, Allaby RG. 2018. Multiproxy evidence highlights a complex  
619 evolutionary legacy of maize in South America. *Science* **362**:1309-1313. DOI:  
620 <https://doi.org/doi:10.1126/science.aav0207>
- 621 Larson G, Piperno Dolores R, Allaby Robin G, Purugganan Michael D, Andersson L, Arroyo-  
622 Kalin M, Barton L, Climer Vigueira C, Denham T, Dobney K, Doust Andrew N, Gepts P,  
623 Gilbert MTP, Gremillion Kristen J, Lucas L, Lukens L, Marshall Fiona B, Olsen Kenneth  
624 M, Pires JC, Richerson Peter J, Rubio de Casas R, Sanjur Oris I, Thomas Mark G, Fuller  
625 Dorian Q. 2014. Current perspectives and the future of domestication studies.  
626 *Proceedings of the National Academy of Sciences* **111**:6139-6146. DOI:  
627 <https://doi.org/10.1073/pnas.1323964111>
- 628 Lee CR, Svardal H, Farlow A, Exposito-Alonso M, Ding W, Novikova P, Alonso-Blanco C,  
629 Weigel D, Nordborg M. 2017. On the post-glacial spread of human commensal



- 630 *Arabidopsis thaliana*. *Nature communications* **8**:14458. DOI:  
631 <https://doi.org/10.1038/ncomms14458>
- 632 Li H, Durbin R. 2009. Fast and accurate short read alignment with Burrows-Wheeler transform.  
633 *Bioinformatics* **25**:1754-1760. DOI: <https://doi.org/10.1093/bioinformatics/btp324>
- 634 Li H, Handsaker B, Wysoker A, Fennell T, Ruan J, Homer N, Marth G, Abecasis G, Durbin R,  
635 Subgroup GPD. 2009. The Sequence Alignment/Map format and SAMtools.  
636 *Bioinformatics* **25**:2078-2079. DOI: <https://doi.org/10.1093/bioinformatics/btp352>
- 637 Marcott SA, Shakun JD, Clark PU, Mix AC. 2013. A reconstruction of regional and global  
638 temperature for the past 11,300 years. *Science* **339**:1198-1201. DOI:  
639 <https://doi.org/10.1126/science.1228026>
- 640 Matsuoka Y, Vigouroux Y, Goodman MM, Sanchez G J, Buckler E, Doebley J. 2002. A single  
641 domestication for maize shown by multilocus microsatellite genotyping. *Proceedings of*  
642 *the National Academy of Sciences* **99**:6080-6084. DOI:  
643 <https://doi.org/10.1073/pnas.052125199>
- 644 McKenna A, Hanna M, Banks E, Sivachenko A, Cibulskis K, Kernytzky A, Garimella K,  
645 Altshuler D, Gabriel S, Daly M, DePristo MA. 2010. The Genome Analysis Toolkit: a  
646 MapReduce framework for analyzing next-generation DNA sequencing data. *Genome*  
647 *research* **20**:1297-1303. DOI: <https://doi.org/10.1101/gr.107524.110>
- 648 Meyer RS, Purugganan MD. 2013. Evolution of crop species: genetics of domestication and  
649 diversification. *Nature Reviews Genetics* **14**:840-852. DOI:  
650 <https://doi.org/10.1038/nrg3605>
- 651 Michel BE, Kaufmann MR. 1973. The osmotic potential of polyethylene glycol 6000. *Plant*  
652 *physiology* **51**:914-916. DOI: <https://doi.org/10.1104/pp.51.5.914>
- 653 Miller NF. 1999. Agricultural development in western Central Asia in the Chalcolithic and  
654 Bronze Ages. *Vegetation History and Archaeobotany* **8**:13-19. DOI:  
655 <https://doi.org/10.1007/BF02042837>
- 656 Nair R, Schreinemachers P. 2020. Global status and economic importance of mungbean. In:  
657 Nair R, Schafleitner R, Lee S-H (Eds). *The Mungbean Genome*. Berlin: Springer  
658 International Publishing. p. 1-8.
- 659 Neji M, Geuna F, Taamalli W, Ibrahim Y, Smida M, Badri M, Abdelly C, Gandour M. 2015.  
660 Morpho-phenological diversity among Tunisian natural populations of *Brachypodium*

- 661 *hybridum*. *The Journal of Agricultural Science* **153**:1006-1016. DOI:  
662 <https://doi.org/10.1017/S0021859614000689>
- 663 Noble TJ, Tao Y, Mace ES, Williams B, Jordan DR, Douglas CA, Mundree SG. 2018.  
664 Characterization of linkage disequilibrium and population structure in a mungbean  
665 diversity panel. *Frontiers in Plant Science* **8**:2102. DOI:  
666 <https://doi.org/10.3389/fpls.2017.02102>
- 667 Patterson N, Moorjani P, Luo Y, Mallick S, Rohland N, Zhan Y, Genschoreck T, Webster T,  
668 Reich D. 2012. Ancient admixture in human history. *Genetics* **192**:1065-1093. DOI:  
669 <https://doi.org/10.1534/genetics.112.145037>
- 670 Phillips SJ, Anderson RP, Schapire RE. 2006. Maximum entropy modeling of species  
671 geographic distributions. *Ecological Modelling* **190**:231-259. DOI:  
672 <https://doi.org/10.1016/j.ecolmodel.2005.03.026>
- 673 Pratap A, Gupta S, Basu PS, Tomar R, Dubey S, Rathore M, Prajapati US, Singh P, Kumari G.  
674 2019. Towards development of climate smart mungbean: challenges and opportunities. In:  
675 Kole C (Ed). *Genomic Designing of Climate-Smart Pulse Crops*. Chamsford: Springer  
676 International Publishing. p. 235-264.
- 677 Purcell S, Neale B, Todd-Brown K, Thomas L, Ferreira MAR, Bender D, Maller J, Sklar P, de  
678 Bakker PIW, Daly MJ, Sham PC. 2007. PLINK: A tool set for whole-genome association  
679 and population-based linkage analyses. *The American Journal of Human Genetics*  
680 **81**:559-575. DOI: <https://doi.org/10.1086/519795>
- 681 Rani S, Schreinemachers P, Kuziyev B. 2018. Mungbean as a catch crop for dryland systems in  
682 Pakistan and Uzbekistan: A situational analysis. *Cogent Food & Agriculture* **4**:1499241.  
683 DOI: <https://doi.org/10.1080/23311932.2018.1499241>
- 684 Razifard H, Ramos A, Della Valle AL, Bodary C, Goetz E, Manser EJ, Li X, Zhang L, Visa S,  
685 Tieman D, van der Knaap E, Caicedo AL. 2020. Genomic evidence for complex  
686 domestication history of the cultivated tomato in Latin America. *Molecular biology and*  
687 *evolution* **37**:1118-1132. DOI: <https://doi.org/10.1093/molbev/msz297>
- 688 Sandhu K, Singh A. 2021. Strategies for the utilization of the USDA mung bean germplasm  
689 collection for breeding outcomes. *Crop Science* **61**:422-442. DOI:  
690 <https://doi.org/10.1002/csc2.20322>

- 691 Sangiri C, Kaga A, Tomooka N, Vaughan D, Srinives P. 2007. Genetic diversity of the  
692 mungbean (*Vigna radiata*, Leguminosae) genepool on the basis of microsatellite analysis.  
693 *Australian Journal of Botany* **55**:837-847. DOI: <https://doi.org/10.1071/BT07105>
- 694 Sokolkova A, Burlyaeva M, Valiannikova T, Vishnyakova M, Schafleitner R, Lee C-R, Ting C-  
695 T, Nair RM, Nuzhdin S, Samsonova M, von Wettberg E. 2020. Genome-wide association  
696 study in accessions of the mini-core collection of mungbean (*Vigna radiata*) from the  
697 World Vegetable Gene Bank (Taiwan). *BMC plant biology* **20**:363. DOI:  
698 <https://doi.org/10.1186/s12870-020-02579-x>
- 699 Spengler RN, Maksudov F, Bullion E, Merkle A, Hermes T, Frachetti M. 2018. Arboreal crops  
700 on the medieval Silk Road: Archaeobotanical studies at Tashbulak. *PloS one*  
701 **13**:e0201409. DOI: <https://doi.org/10.1371/journal.pone.0201409>
- 702 Spengler RN, Miller NF, Neef R, Tourtellotte PA, Chang C. 2017. Linking agriculture and  
703 exchange to social developments of the Central Asian Iron Age. *Journal of*  
704 *Anthropological Archaeology* **48**:295-308. DOI: <https://doi.org/10.1016/j.jaa.2017.09.002>
- 705 The 1001 Genomes Consortium. 2016. 1,135 Genomes reveal the global pattern of  
706 polymorphism in *Arabidopsis thaliana*. *Cell* **166**:481-491. DOI:  
707 <https://doi.org/10.1016/j.cell.2016.05.063>
- 708 Tomooka N, Lairungreang C, Nakeeraks P, Egawa Y, Thavarasook C. 1992. Center of genetic  
709 diversity and dissemination pathways in mung bean deduced from seed protein  
710 electrophoresis. *Theoretical and Applied Genetics* **83**:289-293. DOI:  
711 <https://doi.org/10.1007/BF00224273>
- 712 Varshney RK, Roorkiwal M, Sun S, Bajaj P, Chitikineni A, Thudi M, Singh NP, Du X,  
713 Upadhyaya HD, Khan AW, Wang Y, Garg V, Fan G, Cowling WA, Crossa J, Gentzmittel  
714 L, Voss-Fels KP, Valluri VK, Sinha P, Singh VK, Ben C, Rathore A, Punna R, Singh  
715 MK, Tar'an B, Bharadwaj C, Yasin M, Pithia MS, Singh S, Soren KR, Kudapa H,  
716 Jarquín D, Cubry P, Hickey LT, Dixit GP, Thuillet A-C, Hamwiah A, Kumar S, Deokar  
717 AA, Chaturvedi SK, Francis A, Howard R, Chattopadhyay D, Edwards D, Lyons E,  
718 Vigouroux Y, Hayes BJ, von Wettberg E, Datta SK, Yang H, Nguyen HT, Wang J,  
719 Siddique KHM, Mohapatra T, Bennetzen JL, Xu X, Liu X. 2021. A chickpea genetic  
720 variation map based on the sequencing of 3,366 genomes. *Nature* **599**:622-627. DOI:  
721 <https://doi.org/10.1038/s41586-021-04066-1>

- 722 Warren DL, Glor RE, Turelli M. 2010. ENMTools: a toolbox for comparative studies of  
723 environmental niche models. *Ecography* **33**:607-611. DOI:  
724 <https://doi.org/10.1111/j.1600-0587.2009.06142.x>
- 725 Wei T, van Treuren R, Liu X, Zhang Z, Chen J, Liu Y, Dong S, Sun P, Yang T, Lan T, Wang X,  
726 Xiong Z, Liu Y, Wei J, Lu H, Han S, Chen JC, Ni X, Wang J, Yang H, Xu X, Kuang H,  
727 van Hintum T, Liu X, Liu H. 2021. Whole-genome resequencing of 445 *Lactuca*  
728 accessions reveals the domestication history of cultivated lettuce. *Nature genetics*  
729 **53**:752-760. DOI: <https://doi.org/10.1038/s41588-021-00831-0>
- 730 Zhang C, Dong SS, Xu JY, He WM, Yang TL. 2019. PopLDdecay: a fast and effective tool for  
731 linkage disequilibrium decay analysis based on variant call format files. *Bioinformatics*  
732 **35**:1786-1788. DOI: <https://doi.org/10.1093/bioinformatics/bty875>
- 733 Zhang Y, Meyers PA, Liu X, Wang G, Ma X, Li X, Yuan Y, Wen B. 2016. Holocene climate  
734 changes in the central Asia mountain region inferred from a peat sequence from the Altai  
735 Mountains, Xinjiang, northwestern China. *Quaternary Science Reviews* **152**:19-30. DOI:  
736 <https://doi.org/10.1016/j.quascirev.2016.09.016>
- 737

738 **Supplementary note.** Text analysis and translation of ancient Chinese texts regarding mungbean

739

740 Qimin Yaoshu (齊民要術, about 544 AD)

741 Qimin Yaoshu, compiled by Sixie Jia (賈思勰), is one of the earliest and most complete  
742 agricultural sources in China, detailing agricultural techniques near the lower reaches of Yellow  
743 River at that era. This is the earliest record of mungbean in China, demonstrating mungbean has  
744 reached northern China at that time and is consistent with our estimates of population divergence  
745 time. The popularity of mungbean is demonstrated by it being mentioned multiple times under  
746 different contexts, most notably as a green manure:

747 「若糞不可得者，五六月中，概種菘豆，至七月、八月，犁掩殺之。如以糞糞田，則  
748 良美與糞不殊，又省功力。」

749 Translation: “Should feces be unavailable, during May and June one could grow mungbean.  
750 Until July or August, one could plow mungbean plants into the soil. This is equivalent to using  
751 feces to manure the land. This is as good as using feces and saves efforts.”

752 Notice that the months used in ancient China are slightly different from the Gregorian  
753 calendar.

754

755 Xiangshan Yelu (湘山野錄, 1068-1077 AD)

756 Xiangshan Yelu was written by a monk, Wen-Ying (文瑩), recording anecdotes during  
757 that era. Its records about the Emperor Zhenzong of Song (宋真宗, 968-1022 AD) detailed the  
758 phenotypes of Indian mungbean at that time:

759 「真宗深念稼穡，聞占城稻耐旱、西天綠豆子多而粒大，各遣使以珍貨求其種。占城  
760 得種二十石，至今在處播之。西天中印土得菘豆種二石，不知今之菘豆是否？」

761 Translation: “Zhenzong of Song deeply concerned about agriculture. He heard Champa rice  
762 being drought tolerant and mungbean from India produce numerous and large seeds. Diplomats  
763 were sent to exchange the seeds with treasure. Twenty dans of Champa rice were obtained and  
764 propagated everywhere. Two dans of mungbean were obtained from India, but it is unclear  
765 whether the mungbean today descended from these.”

766 “Dan” (石) is a unit of volume in ancient China and is called “Koku” in Japanese. The  
767 exact amount varied with time.

768 The texts provide us with two pieces of important information. First, mungbean from  
769 South Asia (likely also includes the Southeast Asian genetic groups if accessions near eastern  
770 India and Bangladesh were included) at that time had higher yield and larger seeds than native  
771 cultivars in northern China, consistent with our results on trait divergence. Second, compared to  
772 the clear success of Champa rice in China, it was unclear whether those southern accessions had  
773 prospered in northern China, likely suggesting an unsuccessful introduction of southern high-  
774 yield and large-seeded accessions to the north.

775

776 Tiangong Kaiwu (天工開物, 1637 AD)

777 Tiangong Kaiwu is a famous Chinese encyclopedia compiled by Song Yingxing (宋應  
778 星). While it mostly covers technologies at that time, a section about agricultural practices covers  
779 mungbean:

780 「綠豆必小暑方種，未及小暑而種，則其苗蔓延數尺，結莢甚稀。若過期至於處暑，  
781 則隨時開花結莢，顆粒亦少。」

782 Translation: “Mungbean must be sown at or after Xiaoshu (Gregorian 7-8 July). Being  
783 sown before Xiaoshu, mungbean stems would spread for meters with few pods set. Being sown  
784 as late as Chushu (Gregorian 23-24 August), the plants would flower and set pods at any time,  
785 also with low yield.”

786 As a short-day plant, being sown too early when the days are too long, mungbean would  
787 have mostly vegetative growth. Being sown too late when the days are too short, flowering  
788 would be induced too quickly before sufficient vegetative development. In addition to our results  
789 that short-season accessions were favored in the north due to the requirement for drought escape,  
790 this source provides us with another support that mungbean could only be sown in a narrow time  
791 window due to daylength requirement. Given the autumn frost damage in the north, not being  
792 able to be sown earlier restricts the growing season length in the north, limiting the adoption of  
793 southern long-season accessions.

794



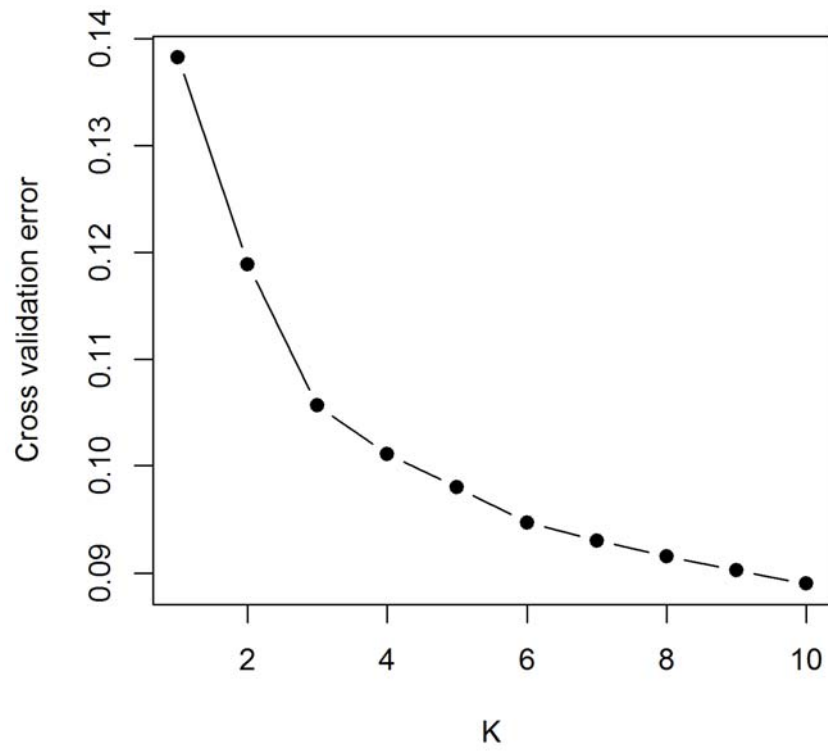

795 **Figure 1-figure supplement 1.** Cross-validation (CV) errors of ADMIXTURE. Means of CV errors were  
796 calculated based on K values ranging 1 to 10 with 10 independent runs.

797

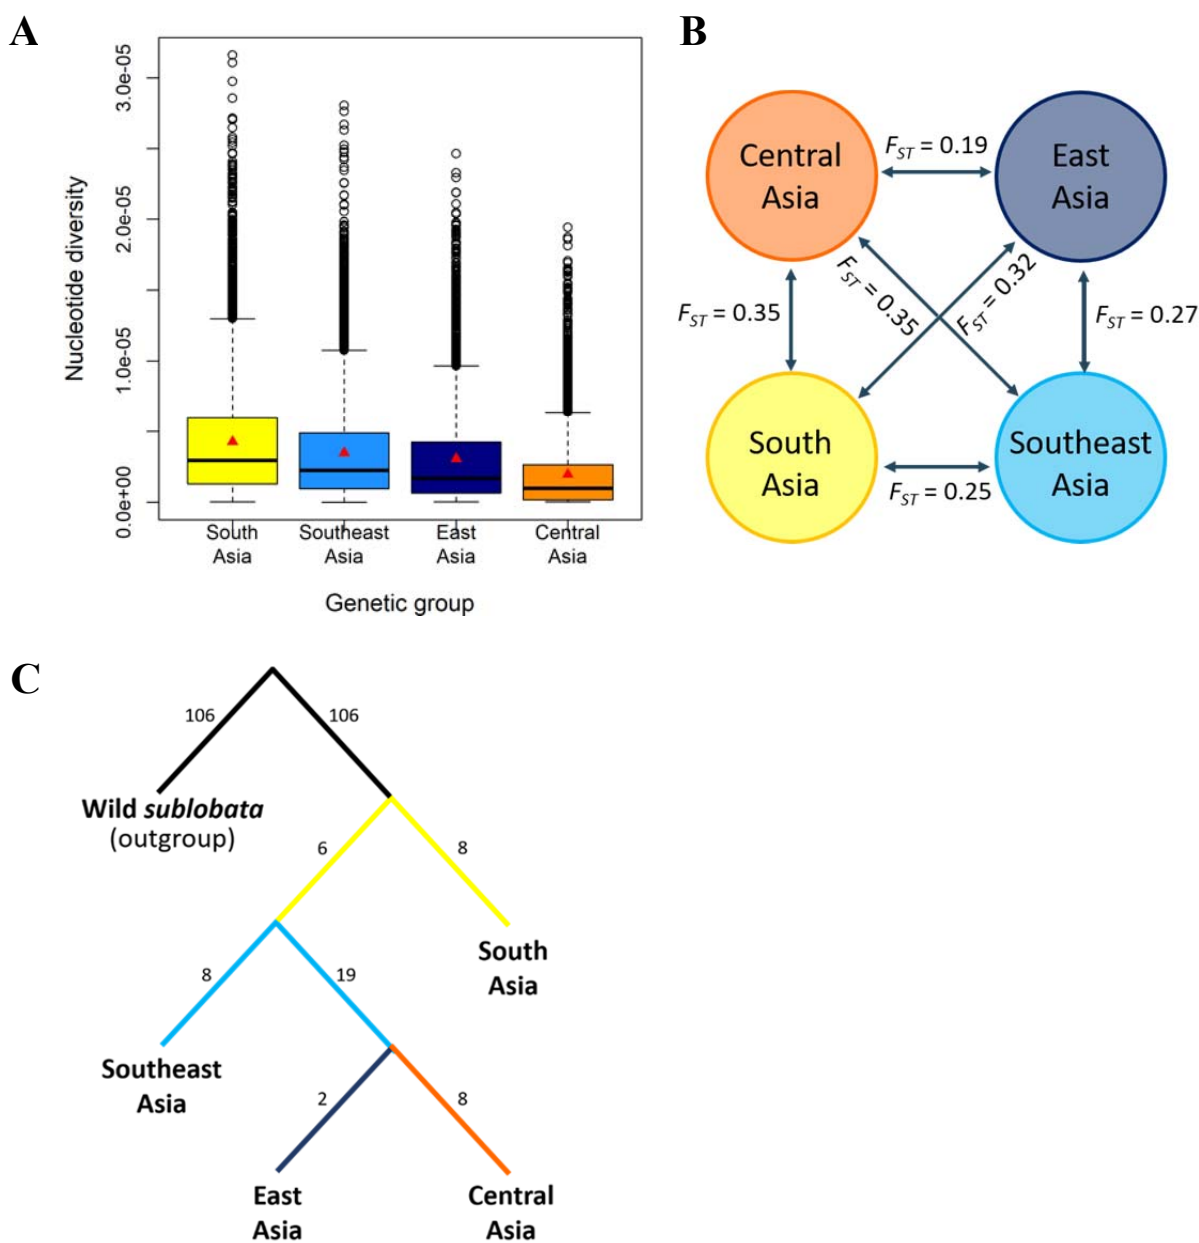

798 **Figure 2-figure supplement 1.** Diversity patterns within and between inferred genetic groups.  
 799 (A) Nucleotide diversity and (B) Pairwise genetic differentiation ( $F_{ST}$ ) across the four genetic  
 800 groups. (C) Best fitting admixture graphs showing no admixture events between four genetic  
 801 groups with wild mungbean as outgroup.

802

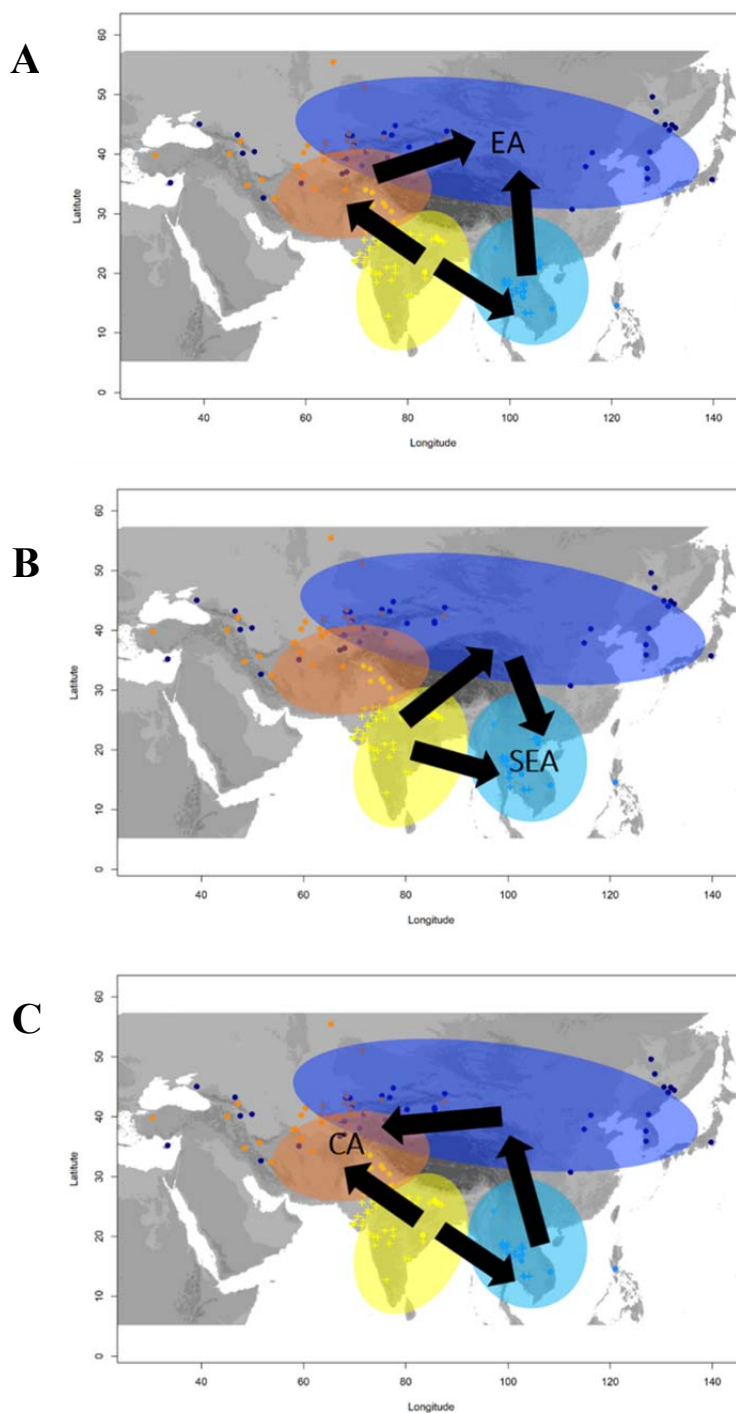

803 **Figure 2-figure supplement 2.** Schematic representation to investigate presence of admixture in  
804 a target population from two source populations using admixture  $f_3$ -statistics. (A)  $f_3$ (EA; SEA,  
805 CA), (B)  $f_3$ (SEA; SA, EA) and (C)  $f_3$ (CA; EA, SA). Coloured circles indicate the geographic  
806 area occupied by distinct genetic groups. Arrows indicates the possible direction of expansion  
807 and admixture among populations.

808

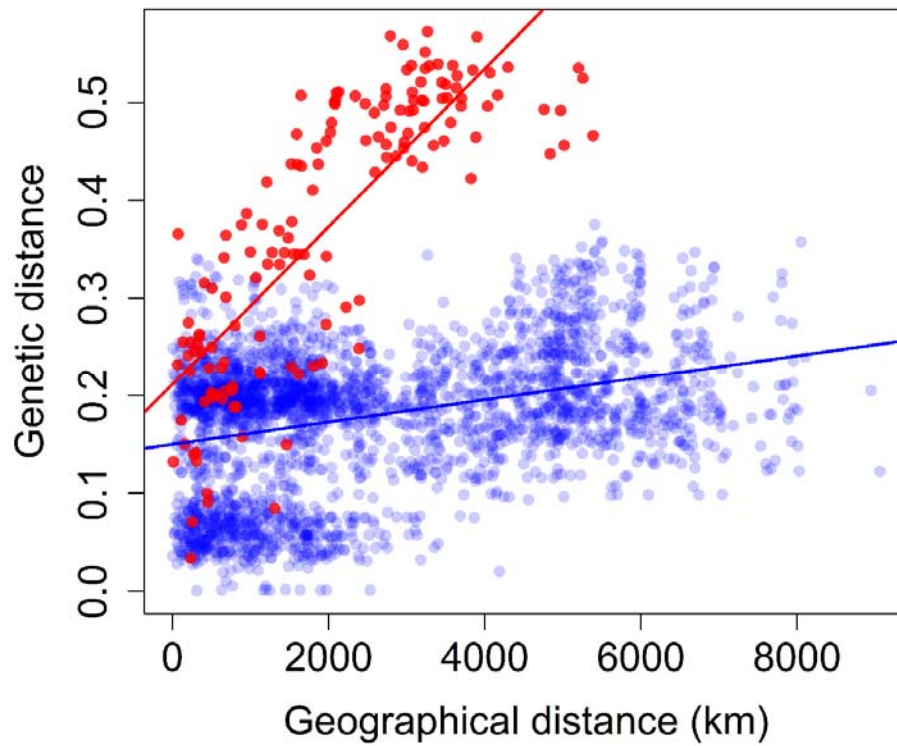

809 **Figure 2-figure supplement 3.** Isolation by distance plot of genetic distance versus geographic  
810 distance within Southern group in red circles (Mantel test:  $r = 0.804$ ,  $P < 0.001$ ) and Northern  
811 group in blue circles (Mantel test:  $r = 0.325$ ,  $P < 0.001$ ).

812

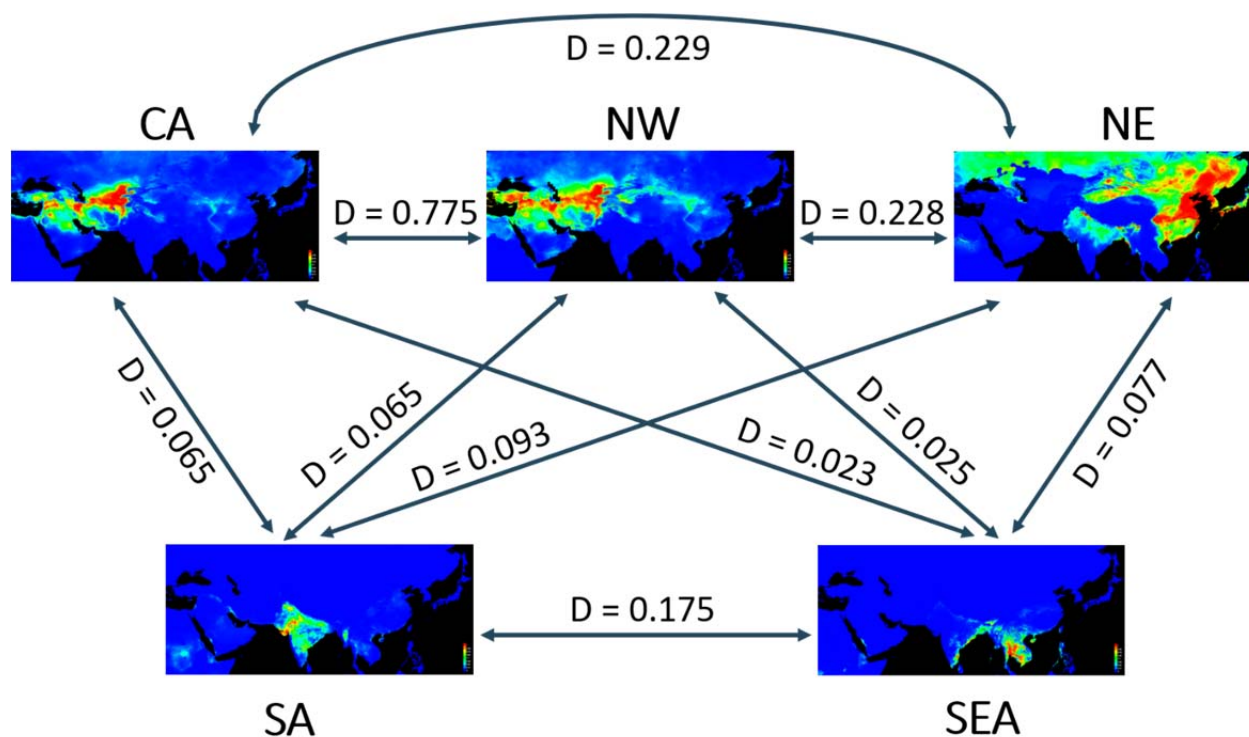

813 **Figure 3-figure supplement 1.** Predicted distributions of five groups at Mid-Holocene (about 6  
814 kya) based on Community Climate Simulation Model 4 (CCSM4). Red colour indicates high  
815 suitability and blue indicates low suitability. Values between groups represent niche overlap  
816 measured using Schoener's D.

817

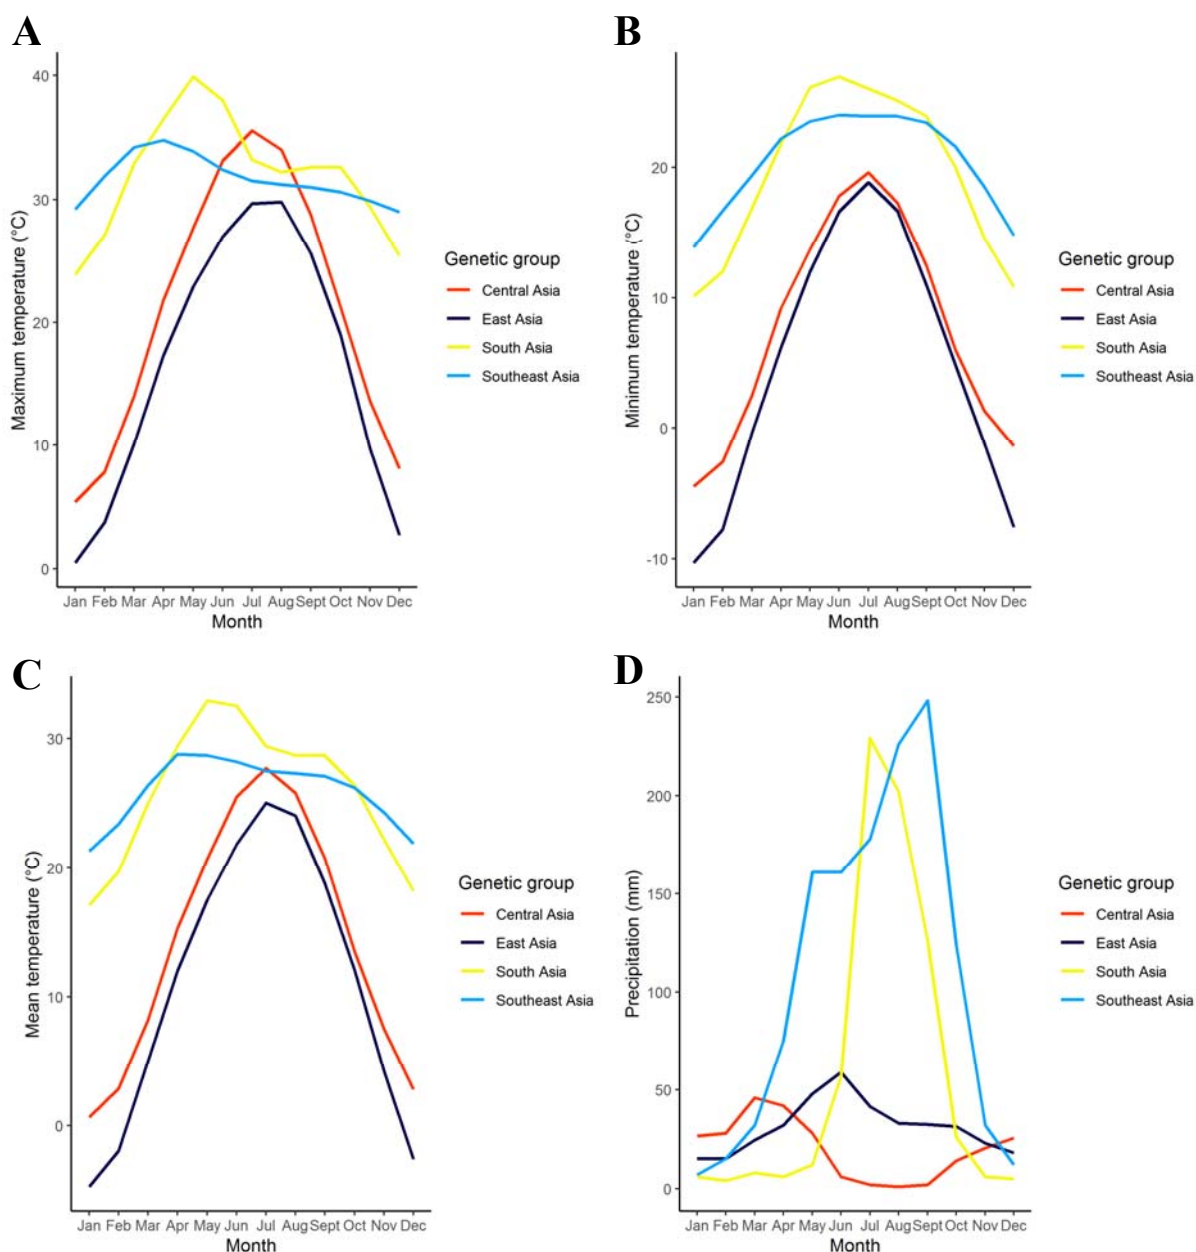

818 **Figure 3-figure supplement 2.** Monthly temperature and precipitation variations among the four  
819 genetic groups. Monthly (A) maximum temperature, (B) minimum temperature, (C) mean  
820 temperature and (D) precipitation were computed based on median value among all accessions of  
821 a group. Genetic group were coloured the same as in Fig. 1.

822



823 **Supplementary file 1. Mungbean accessions from Vavilov Institute (VIR) collection**

824

| <b>Sample name</b> | <b>Country</b>                   | <b>Latitude</b> | <b>Longitude</b> | <b>NCBI SRA accession</b> | <b>NCBI Biosample accession</b> |
|--------------------|----------------------------------|-----------------|------------------|---------------------------|---------------------------------|
| 1.B                | USA                              | NA              | NA               | SRR18125483               | SAMN26179197                    |
| 100.A              | Cyprus                           | 35.1856         | 33.3823          | SRR18125482               | SAMN26179198                    |
| 101.A              | Morocco                          | 33.9716         | -6.8498          | SRR18125266               | SAMN26179199                    |
| 102.A              | Israel                           | 32.4971         | 35.4973          | SRR18125200               | SAMN26179200                    |
| 103.A              | Indonesia                        | -6.5971         | 106.806          | SRR18125367               | SAMN26179201                    |
| 104.B              | Russia                           | 44.9003         | 131.8351         | SRR18125356               | SAMN26179202                    |
| 105.A              | Chile                            | -36.8305        | -73.1167         | SRR18125345               | SAMN26179203                    |
| 106.A              | India                            | 22.5587         | 88.2911          | SRR18125298               | SAMN26179204                    |
| 107.A              | India                            | 22.5726         | 88.3639          | SRR18125287               | SAMN26179205                    |
| 108.A              | India                            | 25.9821         | 85.6486          | SRR18125276               | SAMN26179206                    |
| 109.A              | Italy                            | 41.9028         | 12.4964          | SRR18125481               | SAMN26179207                    |
| 10A                | China                            | 47.1216         | 128.7382         | SRR18125398               | SAMN26179208                    |
| 110.B              | Portugal                         | 38.7223         | -9.1393          | SRR18125387               | SAMN26179209                    |
| 111.A              | Portugal                         | 38.7223         | -9.1393          | SRR18125376               | SAMN26179210                    |
| 112.A              | Russia                           | 45.0347         | 39.0978          | SRR18125329               | SAMN26179211                    |
| 113.A              | Tajikistan                       | 40.2675         | 69.6453          | SRR18125318               | SAMN26179212                    |
| 114.B              | India                            | 31.5204         | 74.3587          | SRR18125307               | SAMN26179213                    |
| 115.B              | India                            | 31.5204         | 74.3587          | SRR18125476               | SAMN26179214                    |
| 116.A              | Russia                           | 49.6152         | 127.9945         | SRR18125465               | SAMN26179215                    |
| 116.B              | Russia                           | 49.6152         | 127.9945         | SRR18125454               | SAMN26179216                    |
| 117.B              | Russia                           | 44.0281         | 131.3273         | SRR18125264               | SAMN26179217                    |
| 118.A              | Russia                           | 44.0118         | 131.3835         | SRR18125253               | SAMN26179218                    |
| 119.A              | Russia                           | 44.39           | 132.558          | SRR18125242               | SAMN26179219                    |
| 11A                | China                            | 47.1216         | 128.7382         | SRR18125231               | SAMN26179220                    |
| 120.A              | Argentina                        | -32.8895        | -68.8458         | SRR18125434               | SAMN26179221                    |
| 122.A              | Japan                            | 31.5969         | 130.5571         | SRR18125423               | SAMN26179222                    |
| 123.B              | Kyrgyzstan                       | 55.4649         | 65.3054          | SRR18125412               | SAMN26179223                    |
| 124.B              | Ethiopia                         | 12.9545         | 36.1573          | SRR18125223               | SAMN26179224                    |
| 125.A              | China                            | 42.5246         | 87.5396          | SRR18125212               | SAMN26179225                    |
| 126.A              | China                            | 42.5246         | 87.5396          | SRR18125201               | SAMN26179226                    |
| 127.A              | China                            | 42.5246         | 87.5396          | SRR18125199               | SAMN26179227                    |
| 128.A              | Democratic Republic of the Congo | 1.9293          | 30.0492          | SRR18125198               | SAMN26179228                    |
| 128.B              | Democratic Republic of the Congo | 1.9293          | 30.0492          | SRR18125197               | SAMN26179229                    |
| 129.A              | Korea                            | 37.5665         | 126.978          | SRR18125196               | SAMN26179230                    |

|       |                |          |          |             |              |
|-------|----------------|----------|----------|-------------|--------------|
| 12A   | China          | 47.1216  | 128.7382 | SRR18125195 | SAMN26179231 |
| 13.A  | Iran           | 32.4279  | 53.688   | SRR18125194 | SAMN26179232 |
| 130.A | Korea          | 37.5665  | 126.978  | SRR18125371 | SAMN26179233 |
| 131.A | Korea          | 37.5665  | 126.978  | SRR18125370 | SAMN26179234 |
| 132.B | Korea          | 40.3399  | 127.5101 | SRR18125369 | SAMN26179235 |
| 133.A | Korea          | 40.3399  | 127.5101 | SRR18125368 | SAMN26179236 |
| 134.A | Korea          | 40.3399  | 127.5101 | SRR18125366 | SAMN26179237 |
| 135.A | Korea          | 40.3399  | 127.5101 | SRR18125365 | SAMN26179238 |
| 136.A | Korea          | 40.3399  | 127.5101 | SRR18125364 | SAMN26179239 |
| 137.A | China          | 42.5246  | 87.5396  | SRR18125363 | SAMN26179240 |
| 138.A | China          | 39.4677  | 75.9938  | SRR18125362 | SAMN26179241 |
| 139.A | Uzbekistan     | 41.2995  | 69.2401  | SRR18125361 | SAMN26179242 |
| 14.B  | Uzbekistan     | 39.7681  | 64.4556  | SRR18125360 | SAMN26179243 |
| 140.B | China          | 42.5246  | 87.5396  | SRR18125359 | SAMN26179244 |
| 141.A | China          | 43.8256  | 87.6168  | SRR18125358 | SAMN26179245 |
| 142.B | China          | 42.5246  | 87.5396  | SRR18125357 | SAMN26179246 |
| 144.A | Ukraine        | 48.4647  | 35.0462  | SRR18125355 | SAMN26179247 |
| 145.A | Brazil         | -22.9329 | -47.0738 | SRR18125354 | SAMN26179248 |
| 146.B | Kazakhstan     | 43.222   | 76.8512  | SRR18125353 | SAMN26179249 |
| 147.A | Turkey         | 39.7646  | 30.4559  | SRR18125352 | SAMN26179250 |
| 148.B | Turkey         | 39.7646  | 30.4559  | SRR18125351 | SAMN26179251 |
| 149.A | Ukraine        | 48.0386  | 30.9497  | SRR18125350 | SAMN26179252 |
| 151.A | Tajikistan     | 38.5598  | 68.787   | SRR18125349 | SAMN26179253 |
| 154.A | Brazil         | -14.235  | -51.9253 | SRR18125348 | SAMN26179254 |
| 155.A | United Kingdom | 52.3555  | -1.1743  | SRR18125347 | SAMN26179255 |
| 156.A | India          | 25.9821  | 85.6486  | SRR18125346 | SAMN26179256 |
| 157.A | India          | 25.9821  | 85.6486  | SRR18125344 | SAMN26179257 |
| 158.A | India          | 25.9821  | 85.6486  | SRR18125343 | SAMN26179258 |
| 159.B | India          | 25.9821  | 85.6486  | SRR18125342 | SAMN26179259 |
| 16.A  | Uzbekistan     | 39.7681  | 64.4556  | SRR18125341 | SAMN26179260 |
| 160.A | Uzbekistan     | 40.8154  | 72.2837  | SRR18125340 | SAMN26179261 |
| 161.A | Uzbekistan     | 40.8154  | 72.2837  | SRR18125339 | SAMN26179262 |
| 162.A | South Africa   | -26.7145 | 27.097   | SRR18125338 | SAMN26179263 |
| 163.A | South Africa   | -26.7145 | 27.097   | SRR18125337 | SAMN26179264 |
| 164.A | South Africa   | -26.7145 | 27.097   | SRR18125336 | SAMN26179265 |
| 165.B | USA            | 39.9526  | -75.1652 | SRR18125299 | SAMN26179266 |
| 166.A | USA            | 39.9526  | -75.1652 | SRR18125297 | SAMN26179267 |
| 167.B | Kyrgyzstan     | 42.8224  | 75.3179  | SRR18125296 | SAMN26179268 |
| 168.A | Kyrgyzstan     | 42.8224  | 75.3179  | SRR18125295 | SAMN26179269 |
| 17.B  | Uzbekistan     | 39.7681  | 64.4556  | SRR18125294 | SAMN26179270 |
| 170.A | Russia         | 43.2562  | 46.5893  | SRR18125293 | SAMN26179271 |

|       |             |           |           |             |              |
|-------|-------------|-----------|-----------|-------------|--------------|
| 171.A | Russia      | 43.2562   | 46.5893   | SRR18125292 | SAMN26179272 |
| 172.B | Iran        | 32.4279   | 53.688    | SRR18125291 | SAMN26179273 |
| 173.A | Iran        | 32.4279   | 53.688    | SRR18125290 | SAMN26179274 |
| 174.A | Korea       | 40.3399   | 127.5101  | SRR18125289 | SAMN26179275 |
| 175.A | Uzbekistan  | 40.2504   | 63.2032   | SRR18125288 | SAMN26179276 |
| 175.B | Uzbekistan  | 40.2504   | 63.2032   | SRR18125286 | SAMN26179277 |
| 176.A | Uzbekistan  | 40.2504   | 63.2032   | SRR18125285 | SAMN26179278 |
| 177.A | Uzbekistan  | 40.2504   | 63.2032   | SRR18125284 | SAMN26179279 |
| 178.A | Uzbekistan  | 40.2504   | 63.2032   | SRR18125283 | SAMN26179280 |
| 179.A | Uzbekistan  | 39.9208   | 66.4271   | SRR18125282 | SAMN26179281 |
| 18.B  | Uzbekistan  | 39.7681   | 64.4556   | SRR18125281 | SAMN26179282 |
| 180.A | Uzbekistan  | 39.9208   | 66.4271   | SRR18125280 | SAMN26179283 |
| 181.A | Uzbekistan  | 39.9208   | 66.4271   | SRR18125279 | SAMN26179284 |
| 182.B | Uzbekistan  | 39.9208   | 66.4271   | SRR18125278 | SAMN26179285 |
| 183.A | Uzbekistan  | 40.3734   | 71.7978   | SRR18125277 | SAMN26179286 |
| 184.A | China       | 41.482754 | 85.626702 | SRR18125275 | SAMN26179287 |
| 187.A | China       | 38.10222  | 76.993816 | SRR18125274 | SAMN26179288 |
| 188.B | China       | 41.1675   | 80.2634   | SRR18125273 | SAMN26179289 |
| 189.A | China       | 41.1675   | 80.2634   | SRR18125272 | SAMN26179290 |
| 19.B  | Iran        | 32.4279   | 53.688    | SRR18125271 | SAMN26179291 |
| 190.A | China       | 42.9513   | 89.1898   | SRR18125270 | SAMN26179292 |
| 191.A | China       | 41.175324 | 85.660861 | SRR18125269 | SAMN26179293 |
| 192.A | India       | 31.8183   | 75.2071   | SRR18125268 | SAMN26179294 |
| 193.A | India       | 31.326    | 75.5762   | SRR18125267 | SAMN26179295 |
| 193.B | India       | 31.326    | 75.5762   | SRR18125265 | SAMN26179296 |
| 194.A | India       | 30.3752   | 76.7821   | SRR18125480 | SAMN26179297 |
| 195.A | India       | 28.7041   | 77.1025   | SRR18125407 | SAMN26179298 |
| 195.B | India       | 28.7041   | 77.1025   | SRR18125406 | SAMN26179299 |
| 197.A | India       | 17.6599   | 75.9064   | SRR18125405 | SAMN26179300 |
| 199.A | Senegal     | 14.4974   | -14.4524  | SRR18125404 | SAMN26179301 |
| 1A    | USA         | NA        | NA        | SRR18125403 | SAMN26179302 |
| 201.B | Pakistan    | 31.5204   | 74.3587   | SRR18125402 | SAMN26179303 |
| 202.B | Canada      | 43.6502   | -79.9036  | SRR18125401 | SAMN26179304 |
| 203.A | Ethiopia    | 9.3126    | 42.1227   | SRR18125400 | SAMN26179305 |
| 204.B | Indonesia   | -6.5971   | 106.806   | SRR18125399 | SAMN26179306 |
| 205.A | Indonesia   | -6.5971   | 106.806   | SRR18125397 | SAMN26179307 |
| 205.B | Indonesia   | -6.5971   | 106.806   | SRR18125396 | SAMN26179308 |
| 206.A | Hungary     | 47.1625   | 19.5033   | SRR18125395 | SAMN26179309 |
| 207.A | Viet Nam    | 14.0583   | 108.2772  | SRR18125394 | SAMN26179310 |
| 21.B  | Kazakhstan  | 51.1605   | 71.4704   | SRR18125393 | SAMN26179311 |
| 210.A | Afghanistan | 36.6926   | 67.118    | SRR18125392 | SAMN26179312 |

|       |              |           |           |             |              |
|-------|--------------|-----------|-----------|-------------|--------------|
| 212.A | Viet Nam     | 21.0278   | 105.8342  | SRR18125391 | SAMN26179313 |
| 215.A | Guinea       | 8.5383    | -9.4728   | SRR18125390 | SAMN26179314 |
| 216.A | Uzbekistan   | 39.972132 | 65.558096 | SRR18125389 | SAMN26179315 |
| 217.B | Uzbekistan   | 40.162885 | 66.227209 | SRR18125388 | SAMN26179316 |
| 218.A | Uzbekistan   | 40.013465 | 64.943243 | SRR18125386 | SAMN26179317 |
| 219.A | Turkmenistan | 40.243331 | 59.540314 | SRR18125385 | SAMN26179318 |
| 22.B  | Kazakhstan   | 42.3417   | 69.5901   | SRR18125384 | SAMN26179319 |
| 220.A | Turkmenistan | 40.243331 | 59.540314 | SRR18125383 | SAMN26179320 |
| 223.A | Uzbekistan   | 40.483568 | 70.546311 | SRR18125382 | SAMN26179321 |
| 224.A | Iran         | 32.6539   | 51.666    | SRR18125381 | SAMN26179322 |
| 225.A | Pakistan     | 30.3753   | 69.3451   | SRR18125380 | SAMN26179323 |
| 226.B | Pakistan     | 30.3753   | 69.3451   | SRR18125379 | SAMN26179324 |
| 227.A | Pakistan     | 30.3753   | 69.3451   | SRR18125378 | SAMN26179325 |
| 228.B | Turkmenistan | 39.0041   | 63.5688   | SRR18125377 | SAMN26179326 |
| 229.A | Pakistan     | 31.4504   | 73.135    | SRR18125375 | SAMN26179327 |
| 23.A  | Kazakhstan   | 42.3417   | 69.5901   | SRR18125374 | SAMN26179328 |
| 230.A | Pakistan     | 31.4504   | 73.135    | SRR18125373 | SAMN26179329 |
| 230.B | Pakistan     | 31.4504   | 73.135    | SRR18125372 | SAMN26179330 |
| 231.A | Tanzania     | -6.369    | 34.8888   | SRR18125335 | SAMN26179331 |
| 232.A | Iran         | 34.3277   | 47.0778   | SRR18125334 | SAMN26179332 |
| 233.A | Iran         | 32.4279   | 53.688    | SRR18125333 | SAMN26179333 |
| 234.A | India        | 28.6139   | 77.209    | SRR18125332 | SAMN26179334 |
| 235.A | Pakistan     | 33.5651   | 73.0169   | SRR18125331 | SAMN26179335 |
| 235.B | Pakistan     | 33.5651   | 73.0169   | SRR18125330 | SAMN26179336 |
| 236.A | Pakistan     | 34.0155   | 71.6888   | SRR18125328 | SAMN26179337 |
| 237.A | Pakistan     | 28.6001   | 77.227    | SRR18125327 | SAMN26179338 |
| 238.A | Egypt        | 26.8206   | 30.8025   | SRR18125326 | SAMN26179339 |
| 239.A | Kazakhstan   | 44.7689   | 77.5573   | SRR18125325 | SAMN26179340 |
| 24.A  | Uzbekistan   | 41.4065   | 60.3685   | SRR18125324 | SAMN26179341 |
| 240.A | Uzbekistan   | 39.4065   | 67.1418   | SRR18125323 | SAMN26179342 |
| 240.B | Uzbekistan   | 39.4065   | 67.1418   | SRR18125322 | SAMN26179343 |
| 241.A | Uzbekistan   | 40.023044 | 67.433724 | SRR18125321 | SAMN26179344 |
| 242.A | Uzbekistan   | 39.982851 | 67.486778 | SRR18125320 | SAMN26179345 |
| 244.A | Uzbekistan   | 41.773406 | 63.780613 | SRR18125319 | SAMN26179346 |
| 245.A | Kazakhstan   | 43.47491  | 75.335144 | SRR18125317 | SAMN26179347 |
| 246.A | Algeria      | 35.6971   | -0.6308   | SRR18125316 | SAMN26179348 |
| 247.A | Tanzania     | -5.0425   | 32.8197   | SRR18125315 | SAMN26179349 |
| 249.A | Australia    | -32.9283  | 151.7817  | SRR18125314 | SAMN26179350 |
| 25.A  | Uzbekistan   | 41.4065   | 60.3685   | SRR18125313 | SAMN26179351 |
| 250.B | Russia       | NA        | NA        | SRR18125312 | SAMN26179352 |
| 251.B | USA          | NA        | NA        | SRR18125311 | SAMN26179353 |

|       |             |           |           |             |              |
|-------|-------------|-----------|-----------|-------------|--------------|
| 252.A | Afghanistan | 34.7602   | 69.8121   | SRR18125310 | SAMN26179354 |
| 253.A | Afghanistan | 34.7602   | 69.8121   | SRR18125309 | SAMN26179355 |
| 254.A | Yemen       | 15.5527   | 48.5164   | SRR18125308 | SAMN26179356 |
| 254.B | Yemen       | 15.5527   | 48.5164   | SRR18125306 | SAMN26179357 |
| 255.A | Afghanistan | 36.6926   | 67.118    | SRR18125305 | SAMN26179358 |
| 256.A | Afghanistan | 36.6926   | 67.118    | SRR18125304 | SAMN26179359 |
| 257.B | Afghanistan | 36.6926   | 67.118    | SRR18125303 | SAMN26179360 |
| 258.B | Afghanistan | 33.9391   | 67.71     | SRR18125302 | SAMN26179361 |
| 259.B | Colombia    | 4.5709    | -74.2973  | SRR18125301 | SAMN26179362 |
| 26.B  | Uzbekistan  | 41.4065   | 60.3685   | SRR18125300 | SAMN26179363 |
| 260.A | Philippines | 14.5995   | 120.9842  | SRR18125479 | SAMN26179364 |
| 261.B | Kenya       | -1.2921   | 36.8219   | SRR18125478 | SAMN26179365 |
| 262.A | Kenya       | -1.2921   | 36.8219   | SRR18125477 | SAMN26179366 |
| 263.A | Kenya       | -1.2921   | 36.8219   | SRR18125475 | SAMN26179367 |
| 264.A | Kenya       | -1.2921   | 36.8219   | SRR18125474 | SAMN26179368 |
| 265.B | Kenya       | -1.2921   | 36.8219   | SRR18125473 | SAMN26179369 |
| 266.A | Kenya       | -1.2921   | 36.8219   | SRR18125472 | SAMN26179370 |
| 267.A | Kenya       | -1.2921   | 36.8219   | SRR18125471 | SAMN26179371 |
| 268.A | Kenya       | -1.2921   | 36.8219   | SRR18125470 | SAMN26179372 |
| 269.B | Kenya       | -1.2921   | 36.8219   | SRR18125469 | SAMN26179373 |
| 27.A  | Uzbekistan  | 39.7681   | 64.4556   | SRR18125468 | SAMN26179374 |
| 270.A | Kenya       | -1.2921   | 36.8219   | SRR18125467 | SAMN26179375 |
| 271.A | South Korea | 35.8987   | 127.0392  | SRR18125466 | SAMN26179376 |
| 272.A | Australia   | NA        | NA        | SRR18125464 | SAMN26179377 |
| 273.A | Kenya       | -1.2921   | 36.8219   | SRR18125463 | SAMN26179378 |
| 274.A | Kenya       | -1.2921   | 36.8219   | SRR18125462 | SAMN26179379 |
| 275.A | Kenya       | -1.2921   | 36.8219   | SRR18125461 | SAMN26179380 |
| 276.A | Kenya       | -1.2921   | 36.8219   | SRR18125460 | SAMN26179381 |
| 277.B | Kazakhstan  | 43.1521   | 68.2581   | SRR18125459 | SAMN26179382 |
| 278.B | Kazakhstan  | 43.0631   | 69.0851   | SRR18125458 | SAMN26179383 |
| 279.A | Kazakhstan  | 41.5295   | 69.4133   | SRR18125457 | SAMN26179384 |
| 28.A  | Russia      | 42.1432   | 47.095    | SRR18125456 | SAMN26179385 |
| 280.B | Kazakhstan  | 41.5295   | 69.4133   | SRR18125455 | SAMN26179386 |
| 281.B | South Korea | 35.8987   | 127.0392  | SRR18125453 | SAMN26179387 |
| 282.B | South Korea | 35.8987   | 127.0392  | SRR18125452 | SAMN26179388 |
| 283.B | South Korea | 35.8987   | 127.0392  | SRR18125451 | SAMN26179389 |
| 284.A | Tajikistan  | 38.0116   | 71.003    | SRR18125450 | SAMN26179390 |
| 285.A | Tajikistan  | 37.074793 | 67.957222 | SRR18125449 | SAMN26179391 |
| 286.A | Tajikistan  | 37.028926 | 68.004059 | SRR18125448 | SAMN26179392 |
| 287.A | Tajikistan  | 39.179338 | 68.012339 | SRR18125447 | SAMN26179393 |
| 288.A | Philippines | 14.5995   | 120.9842  | SRR18125446 | SAMN26179394 |



|       |              |         |          |             |              |
|-------|--------------|---------|----------|-------------|--------------|
| 289.B | Philippines  | 14.5995 | 120.9842 | SRR18125445 | SAMN26179395 |
| 290.A | China        | 40.2374 | 116.2305 | SRR18125444 | SAMN26179396 |
| 290.B | China        | 40.2374 | 116.2305 | SRR18125263 | SAMN26179397 |
| 291.A | China        | 40.2374 | 116.2305 | SRR18125262 | SAMN26179398 |
| 292.A | China        | 30.7378 | 112.2384 | SRR18125261 | SAMN26179399 |
| 293.A | China        | 30.7378 | 112.2384 | SRR18125260 | SAMN26179400 |
| 294.A | China        | 40.2374 | 116.2305 | SRR18125259 | SAMN26179401 |
| 295.B | China        | 37.8957 | 114.9042 | SRR18125258 | SAMN26179402 |
| 296.A | China        | 37.8957 | 114.9042 | SRR18125257 | SAMN26179403 |
| 297.A | China        | 47.1216 | 128.7382 | SRR18125256 | SAMN26179404 |
| 298.B | China        | 47.1216 | 128.7382 | SRR18125255 | SAMN26179405 |
| 299.A | China        | 40.2374 | 116.2305 | SRR18125254 | SAMN26179406 |
| 2A    | China        | 47.1216 | 128.7382 | SRR18125252 | SAMN26179407 |
| 3.B   | China        | 47.1216 | 128.7382 | SRR18125251 | SAMN26179408 |
| 30.A  | Russia       | 42.1432 | 47.095   | SRR18125250 | SAMN26179409 |
| 300.A | China        | 47.1216 | 128.7382 | SRR18125249 | SAMN26179410 |
| 31.A  | Russia       | 42.1432 | 47.095   | SRR18125248 | SAMN26179411 |
| 32.B  | Russia       | 42.1432 | 47.095   | SRR18125247 | SAMN26179412 |
| 33.A  | USA          | NA      | NA       | SRR18125246 | SAMN26179413 |
| 34.A  | USA          | NA      | NA       | SRR18125245 | SAMN26179414 |
| 34.B  | USA          | NA      | NA       | SRR18125244 | SAMN26179415 |
| 35.A  | Russia       | NA      | NA       | SRR18125243 | SAMN26179416 |
| 36.A  | Russia       | 43.1198 | 131.8869 | SRR18125241 | SAMN26179417 |
| 37.A  | USA          | NA      | NA       | SRR18125240 | SAMN26179418 |
| 38.B  | China        | 44.9188 | 130.5244 | SRR18125239 | SAMN26179419 |
| 39.A  | Iran         | 36.3394 | 59.4698  | SRR18125238 | SAMN26179420 |
| 3A    | China        | 47.1216 | 128.7382 | SRR18125237 | SAMN26179421 |
| 40.B  | Iran         | 36.3394 | 59.4698  | SRR18125236 | SAMN26179422 |
| 41.B  | Iran         | 32.4279 | 53.688   | SRR18125235 | SAMN26179423 |
| 42.A  | Iran         | 32.4279 | 53.688   | SRR18125234 | SAMN26179424 |
| 43.A  | Iran         | 32.4279 | 53.688   | SRR18125233 | SAMN26179425 |
| 44.B  | Turkmenistan | 37.9153 | 58.0897  | SRR18125232 | SAMN26179426 |
| 45.A  | Turkmenistan | 37.9153 | 58.0897  | SRR18125230 | SAMN26179427 |
| 46.A  | Turkmenistan | 37.9153 | 58.0897  | SRR18125443 | SAMN26179428 |
| 47.A  | Turkmenistan | 37.9153 | 58.0897  | SRR18125442 | SAMN26179429 |
| 48.B  | Turkmenistan | 37.9153 | 58.0897  | SRR18125441 | SAMN26179430 |
| 49.B  | Turkmenistan | 37.9172 | 58.0907  | SRR18125440 | SAMN26179431 |
| 4A    | China        | 47.1216 | 128.7382 | SRR18125439 | SAMN26179432 |
| 5.B   | China        | 47.1216 | 128.7382 | SRR18125438 | SAMN26179433 |
| 50.A  | Turkmenistan | 37.9172 | 58.0907  | SRR18125437 | SAMN26179434 |
| 51.B  | Turkmenistan | 37.9601 | 58.3261  | SRR18125436 | SAMN26179435 |



|      |              |         |           |             |              |
|------|--------------|---------|-----------|-------------|--------------|
| 52.A | Turkmenistan | 37.9601 | 58.3261   | SRR18125435 | SAMN26179436 |
| 53.B | USA          | 40.1605 | -103.2144 | SRR18125433 | SAMN26179437 |
| 54.A | USA          | 40.1605 | -103.2144 | SRR18125432 | SAMN26179438 |
| 55.B | Ukraine      | 48.3794 | 31.1656   | SRR18125431 | SAMN26179439 |
| 56.A | Kazakhstan   | 43.3667 | 68.4094   | SRR18125430 | SAMN26179440 |
| 57.A | Iran         | 34.7608 | 48.3988   | SRR18125429 | SAMN26179441 |
| 58.A | Iran         | 35.6892 | 51.389    | SRR18125428 | SAMN26179442 |
| 59.B | Kazakhstan   | 43.3667 | 68.4094   | SRR18125427 | SAMN26179443 |
| 6.B  | China        | 47.1216 | 128.7382  | SRR18125426 | SAMN26179444 |
| 60.A | Kazakhstan   | 42.2663 | 68.1431   | SRR18125425 | SAMN26179445 |
| 61.A | Uzbekistan   | 41.2995 | 69.2401   | SRR18125424 | SAMN26179446 |
| 62.A | Uzbekistan   | 41.2995 | 69.2401   | SRR18125422 | SAMN26179447 |
| 63.A | Uzbekistan   | 41.2995 | 69.2401   | SRR18125421 | SAMN26179448 |
| 64.B | Uzbekistan   | 41.2995 | 69.2401   | SRR18125420 | SAMN26179449 |
| 65.B | Uzbekistan   | 41.2995 | 69.2401   | SRR18125419 | SAMN26179450 |
| 66.B | Uzbekistan   | 41.2995 | 69.2401   | SRR18125418 | SAMN26179451 |
| 67.A | Uzbekistan   | 41.2995 | 69.2401   | SRR18125417 | SAMN26179452 |
| 68.A | Uzbekistan   | 41.2995 | 69.2401   | SRR18125416 | SAMN26179453 |
| 69.A | Uzbekistan   | 40.4915 | 68.7811   | SRR18125415 | SAMN26179454 |
| 70.A | Uzbekistan   | 39.627  | 66.975    | SRR18125414 | SAMN26179455 |
| 71.A | Uzbekistan   | 39.627  | 66.975    | SRR18125413 | SAMN26179456 |
| 72.A | Uzbekistan   | 39.627  | 66.975    | SRR18125411 | SAMN26179457 |
| 73.B | Uzbekistan   | 39.627  | 66.975    | SRR18125410 | SAMN26179458 |
| 74.A | Uzbekistan   | 39.627  | 66.975    | SRR18125409 | SAMN26179459 |
| 75.A | Uzbekistan   | 39.627  | 66.975    | SRR18125408 | SAMN26179460 |
| 76.A | Uzbekistan   | 41.2995 | 69.2401   | SRR18125229 | SAMN26179461 |
| 77.A | Uzbekistan   | 39.7681 | 64.4556   | SRR18125228 | SAMN26179462 |
| 79.B | Uzbekistan   | 39.7681 | 64.4556   | SRR18125227 | SAMN26179463 |
| 7A   | China        | 47.1216 | 128.7382  | SRR18125226 | SAMN26179464 |
| 8.B  | China        | 47.1216 | 128.7382  | SRR18125225 | SAMN26179465 |
| 81.B | Afghanistan  | 34.1769 | 61.7006   | SRR18125224 | SAMN26179466 |
| 82.B | Afghanistan  | 34.1769 | 61.7006   | SRR18125222 | SAMN26179467 |
| 83.A | Afghanistan  | 34.1769 | 61.7006   | SRR18125221 | SAMN26179468 |
| 84.A | Afghanistan  | 34.1769 | 61.7006   | SRR18125220 | SAMN26179469 |
| 85.A | Afghanistan  | 34.1769 | 61.7006   | SRR18125219 | SAMN26179470 |
| 86.A | Afghanistan  | 36.6153 | 66.9293   | SRR18125218 | SAMN26179471 |
| 88.B | Afghanistan  | NA      | NA        | SRR18125217 | SAMN26179472 |
| 89.B | Afghanistan  | 33.9391 | 67.71     | SRR18125216 | SAMN26179473 |
| 90.B | Uzbekistan   | NA      | NA        | SRR18125215 | SAMN26179474 |
| 91.A | Japan        | 35.719  | 139.7456  | SRR18125214 | SAMN26179475 |
| 92.A | Japan        | 35.719  | 139.7456  | SRR18125213 | SAMN26179476 |

|      |              |         |          |             |              |
|------|--------------|---------|----------|-------------|--------------|
| 93.B | Armenia      | 40.0691 | 45.0382  | SRR18125211 | SAMN26179477 |
| 94.A | Iran         | 35.102  | 59.1042  | SRR18125210 | SAMN26179478 |
| 95.A | Azerbaijan   | 40.4093 | 49.8671  | SRR18125209 | SAMN26179479 |
| 96.A | Azerbaijan   | 40.1431 | 47.5769  | SRR18125208 | SAMN26179480 |
| 97.A | Turkmenistan | 39.0041 | 63.5688  | SRR18125207 | SAMN26179481 |
| 98.B | Panama       | 9.3593  | -79.8999 | SRR18125206 | SAMN26179482 |
| 99.A | Panama       | 9.3593  | -79.8999 | SRR18125205 | SAMN26179483 |
| 99.B | Panama       | 9.3593  | -79.8999 | SRR18125204 | SAMN26179484 |
| 9A   | China        | 47.1216 | 128.7382 | SRR18125203 | SAMN26179485 |
| M7.A | India        | 31.5204 | 74.3587  | SRR18125202 | SAMN26179486 |

---

826 **Supplementary file 2.** Outgroup  $f_3$  statistics among all possible combinations of genetic group  
827 pairs  
828

| <b>Outgroup<br/>(C)</b> | <b>Source1<br/>(A)</b> | <b>Source2<br/>(B)</b> | <b><math>f_3</math></b> | <b>Standard error</b> | <b>Z-score</b> | <b>Significant</b> |
|-------------------------|------------------------|------------------------|-------------------------|-----------------------|----------------|--------------------|
| <i>sublobata</i>        | CA                     | EA                     | 0.232                   | 0.005                 | 42.66          | Yes                |
| <i>sublobata</i>        | CA                     | SA                     | 0.209                   | 0.005                 | 38.41          | Yes                |
| <i>sublobata</i>        | CA                     | SEA                    | 0.213                   | 0.005                 | 39.03          | Yes                |
| <i>sublobata</i>        | EA                     | SA                     | 0.209                   | 0.005                 | 38.79          | Yes                |
| <i>sublobata</i>        | EA                     | SEA                    | 0.218                   | 0.005                 | 40.75          | Yes                |
| <i>sublobata</i>        | SA                     | SEA                    | 0.211                   | 0.005                 | 39.41          | Yes                |

829 Abbreviations: SA, South Asia; SEA, Southeast Asia; EA, East Asia and CA, Central Asia  
830 ( $f_3$  statistics with Z-score > |3| are considered significant)  
831

832 **Supplementary file 3.** Admixture  $f_3$  statistics among all possible population trios

833

| <b>Target<br/>(C)</b> | <b>Source1<br/>(A)</b> | <b>Source2<br/>(B)</b> | <b><math>f_3</math></b> | <b>Standard error</b> | <b>Z-score</b> | <b>Significant</b> |
|-----------------------|------------------------|------------------------|-------------------------|-----------------------|----------------|--------------------|
| EA                    | SA                     | CA                     | 0.005                   | 0.001                 | 4.82           | Yes                |
| EA                    | SEA                    | CA                     | -0.001                  | 0.001                 | -0.51          | No                 |
| EA                    | SEA                    | SA                     | 0.020                   | 0.002                 | 13.48          | Yes                |
| SEA                   | CA                     | EA                     | 0.030                   | 0.002                 | 14.7           | Yes                |
| SEA                   | SA                     | CA                     | 0.014                   | 0.002                 | 8.82           | Yes                |
| SEA                   | SA                     | EA                     | 0.009                   | 0.001                 | 6.86           | Yes                |
| SA                    | CA                     | EA                     | 0.032                   | 0.002                 | 16.66          | Yes                |
| SA                    | CA                     | SEA                    | 0.011                   | 0.001                 | 9.02           | Yes                |
| SA                    | EA                     | SEA                    | 0.017                   | 0.001                 | 12.91          | Yes                |
| CA                    | EA                     | SA                     | 0.011                   | 0.001                 | 9.55           | Yes                |
| CA                    | EA                     | SEA                    | 0.016                   | 0.002                 | 10.37          | Yes                |
| CA                    | SEA                    | SA                     | 0.031                   | 0.002                 | 15.65          | Yes                |

834 Abbreviations: SA, South Asia; SEA, Southeast Asia; EA, East Asia and CA, Central Asia  
835 ( $f_3$  statistics with Z-score > |3| are considered significant, but only negative  $f_3$  statistics denote  
836 the target population being admixed from source1 and source2.)

837

838 **Supplementary file 4.** Pearson's correlation coefficient between pairs of bioclimatic variables (denoted in lower triangle)

839

| <b>Bioclimatic variable</b> | <b>Bio1</b> | <b>Bio2</b> | <b>Bio3</b> | <b>Bio4</b> | <b>Bio5</b> | <b>Bio6</b> | <b>Bio7</b> | <b>Bio8</b> | <b>Bio9</b> | <b>Bio10</b> | <b>Bio11</b> | <b>Bio12</b> | <b>Bio13</b> | <b>Bio14</b> | <b>Bio15</b> | <b>Bio16</b> | <b>Bio17</b> | <b>Bio18</b> | <b>Bio19</b> |
|-----------------------------|-------------|-------------|-------------|-------------|-------------|-------------|-------------|-------------|-------------|--------------|--------------|--------------|--------------|--------------|--------------|--------------|--------------|--------------|--------------|
| <b>Bio1</b>                 | 1           | -           | -           | -           | -           | -           | -           | -           | -           | -            | -            | -            | -            | -            | -            | -            | -            | -            | -            |
| <b>Bio2</b>                 | 0.087       | 1           | -           | -           | -           | -           | -           | -           | -           | -            | -            | -            | -            | -            | -            | -            | -            | -            | -            |
| <b>Bio3</b>                 | 0.732       | 0.321       | 1           | -           | -           | -           | -           | -           | -           | -            | -            | -            | -            | -            | -            | -            | -            | -            | -            |
| <b>Bio4</b>                 | -0.814      | 0.011       | -0.876      | 1           | -           | -           | -           | -           | -           | -            | -            | -            | -            | -            | -            | -            | -            | -            | -            |
| <b>Bio5</b>                 | 0.872       | 0.258       | 0.455       | -0.449      | 1           | -           | -           | -           | -           | -            | -            | -            | -            | -            | -            | -            | -            | -            | -            |
| <b>Bio6</b>                 | 0.971       | -0.038      | 0.779       | -0.911      | 0.749       | 1           | -           | -           | -           | -            | -            | -            | -            | -            | -            | -            | -            | -            | -            |
| <b>Bio7</b>                 | -0.773      | 0.225       | -0.784      | 0.973       | -0.377      | -0.896      | 1           | -           | -           | -            | -            | -            | -            | -            | -            | -            | -            | -            | -            |
| <b>Bio8</b>                 | 0.595       | -0.066      | 0.383       | -0.398      | 0.522       | 0.530       | -0.392      | 1           | -           | -            | -            | -            | -            | -            | -            | -            | -            | -            | -            |
| <b>Bio9</b>                 | 0.901       | 0.122       | 0.663       | -0.759      | 0.803       | 0.896       | -0.715      | 0.257       | 1           | -            | -            | -            | -            | -            | -            | -            | -            | -            | -            |
| <b>Bio10</b>                | 0.915       | 0.129       | 0.472       | -0.513      | 0.983       | 0.808       | -0.472      | 0.590       | 0.815       | 1            | -            | -            | -            | -            | -            | -            | -            | -            | -            |
| <b>Bio11</b>                | 0.977       | 0.050       | 0.814       | -0.918      | 0.760       | 0.994       | -0.881      | 0.544       | 0.894       | 0.811        | 1            | -            | -            | -            | -            | -            | -            | -            | -            |
| <b>Bio12</b>                | 0.237       | -0.513      | 0.244       | -0.397      | -0.030      | 0.327       | -0.477      | 0.293       | 0.121       | 0.073        | 0.303        | 1            | -            | -            | -            | -            | -            | -            | -            |
| <b>Bio13</b>                | 0.276       | -0.341      | 0.289       | -0.403      | 0.040       | 0.332       | -0.438      | 0.342       | 0.142       | 0.124        | 0.330        | 0.926        | 1            | -            | -            | -            | -            | -            | -            |
| <b>Bio14</b>                | -0.084      | -0.620      | -0.151      | -0.011      | -0.205      | 0.013       | -0.154      | 0.039       | -0.120      | -0.126       | -0.048       | 0.494        | 0.233        | 1            | -            | -            | -            | -            | -            |
| <b>Bio15</b>                | 0.258       | 0.528       | 0.405       | -0.263      | 0.208       | 0.191       | -0.128      | 0.302       | 0.156       | 0.189        | 0.262        | -0.024       | 0.213        | -0.521       | 1            | -            | -            | -            | -            |
| <b>Bio16</b>                | 0.271       | -0.364      | 0.283       | -0.406      | 0.028       | 0.333       | -0.446      | 0.330       | 0.141       | 0.115        | 0.328        | 0.950        | 0.992        | 0.258        | 0.178        | 1            | -            | -            | -            |
| <b>Bio17</b>                | -0.050      | -0.639      | -0.110      | -0.058      | -0.194      | 0.052       | -0.203      | 0.062       | -0.089      | -0.110       | -0.009       | 0.555        | 0.294        | 0.988        | -0.508       | 0.321        | 1            | -            | -            |
| <b>Bio18</b>                | -0.031      | -0.453      | -0.011      | -0.119      | -0.257      | 0.027       | -0.210      | 0.245       | -0.184      | -0.144       | 0.015        | 0.805        | 0.741        | 0.392        | 0.016        | 0.766        | 0.438        | 1            | -            |
| <b>Bio19</b>                | 0.177       | -0.270      | 0.266       | -0.279      | 0.048       | 0.263       | -0.335      | -0.010      | 0.218       | 0.080        | 0.227        | 0.460        | 0.353        | 0.468        | -0.196       | 0.356        | 0.490        | 0.115        | 1            |

840

841

842

843 **Supplementary file 5.** Comparison of bioclimatic variables among the four genetic groups  
844 analysed with multivariate analysis of variance (MANOVA)  
845

| <b>Predictor</b> | <b>Test statistic</b> | <b>Df</b> | <b>Observed value</b> | <b>F value</b> | <b>Num. Df</b> | <b>Den. Df</b> | <b><i>P</i></b> |
|------------------|-----------------------|-----------|-----------------------|----------------|----------------|----------------|-----------------|
| Genetic group    | Pillai                | 3         | 1.790                 | 44.215         | 24             | 717            | < 2e-16         |
|                  | Wilks                 | 3         | 0.024                 | 74.690         | 24             | 688            | < 2e-16         |
|                  | Hotelling-Lawley      | 3         | 12.716                | 124.870        | 24             | 707            | < 2e-16         |
|                  | Roy                   | 3         | 10.777                | 321.960        | 8              | 239            | < 2e-16         |

846 Df = degree of freedom among groups; Num. Df = degrees of freedom of the model; Den. Df =  
847 degree of freedom of residual  
848



849 **Supplementary file 6.** Summary of ANOVA for bioclimatic variables

850

---

| <b>Bioclimatic variable</b>                | <b>Df</b> | <b>Sum square</b> | <b>Mean square</b> | <b>F value</b> | <b>P</b> |
|--------------------------------------------|-----------|-------------------|--------------------|----------------|----------|
| Bio1 (Annual temperature)                  | 3         | 183.688           | 61.229             | 235.97         | <2.2e-16 |
| Bio2 (Mean diurnal temperature range)      | 3         | 66.253            | 22.085             | 29.813         | <2.2e-16 |
| Bio3 (Isothermality)                       | 3         | 188.031           | 62.677             | 259.34         | <2.2e-16 |
| Bio8 (Mean temperature of wettest quarter) | 3         | 177.063           | 59.021             | 205.91         | <2.2e-16 |
| Bio12 (Annual precipitation)               | 3         | 157.890           | 52.630             | 144.11         | <2.2e-16 |
| Bio14 (Precipitation of driest month)      | 3         | 29.859            | 9.952              | 11.183         | <6.6e-07 |
| Bio15 (Precipitation seasonality)          | 3         | 119.810           | 39.938             | 76.62          | <2.2e-16 |
| Bio19 (Precipitation of coldest quarter)   | 3         | 44.212            | 14.737             | 17.732         | <1.9e-10 |

---

851 Df = degree of freedom among groups

852

853 **Supplementary file 7.** Correlation between eight bioclimatic variables and climatic PC axes 1 to  
854 4  
855

| <b>Bioclimatic variable</b>                | <b>PC1</b>    | <b>PC2</b>    | <b>PC3</b>   | <b>PC4</b>   |
|--------------------------------------------|---------------|---------------|--------------|--------------|
| Bio1 (Annual temperature)                  | <b>-0.445</b> | -0.107        | 0.390        | -0.056       |
| Bio2 (Mean diurnal temperature range)      | 0.193         | <b>-0.564</b> | 0.062        | 0.253        |
| Bio3 (Isothermality)                       | <b>-0.430</b> | -0.082        | <b>0.492</b> | -0.184       |
| Bio8 (Mean temperature of wettest quarter) | <b>-0.486</b> | 0.042         | -0.287       | 0.049        |
| Bio12 (Annual precipitation)               | <b>-0.401</b> | 0.366         | 0.066        | 0.202        |
| Bio14 (Precipitation of driest month)      | 0.017         | <b>0.582</b>  | -0.248       | 0.259        |
| Bio15 (Precipitation seasonality)          | -0.323        | -0.365        | -0.292       | <b>0.667</b> |
| Bio19 (Precipitation of coldest quarter)   | 0.279         | 0.235         | <b>0.607</b> | <b>0.587</b> |

856 (Correlation coefficients with absolute values higher than 0.4 are in bold.)

857

858 **Supplementary file 8.** ANOVA table for all evaluated field traits (phenology, reproduction and size) as well as drought-related traits  
859

| Trait                         | Garden        | Model $r^2$ | Group $F$ | Group $P$ | SEA <sup>1</sup> | SA <sup>1</sup> | CA <sup>1</sup> | Tukey <sup>2</sup> |
|-------------------------------|---------------|-------------|-----------|-----------|------------------|-----------------|-----------------|--------------------|
| <b>Phenology:</b>             |               |             |           |           |                  |                 |                 |                    |
| Days to 50% flowering         | Pakistan 2015 | 0.2388      | 7.2144    | 0.0019*   | -0.3702          | 0.6296          | -0.3525         | B,A,B              |
| Days to 50% flowering         | Taiwan 1984   | 0.5266      | 25.5887   | <.0001*   | 0.5723           | 0.3197          | -1.0685         | A,A,B              |
| Days to 50% flowering         | Taiwan 2018   | 0.4465      | 18.5544   | <.0001*   | 0.0974           | 0.6569          | -0.9633         | A,A,B              |
| <b>Reproduction:</b>          |               |             |           |           |                  |                 |                 |                    |
| 100 seed weight, g            | Pakistan 2015 | 0.4722      | 20.5761   | <.0001*   | 0.9050           | -0.6397         | -0.2756         | A,B,B              |
| Pod length, cm                | Pakistan 2015 | 0.2621      | 8.1698    | 0.0009*   | 0.6810           | -0.2605         | -0.4896         | A,B,B              |
| Pod length, cm                | Taiwan 1984   | 0.7173      | 58.3615   | <.0001*   | 1.0524           | -0.1980         | -1.0232         | A,B,C              |
| Pods per plant                | Pakistan 2015 | 0.4471      | 18.5988   | <.0001*   | -0.6441          | 0.8455          | -0.3062         | B,A,B              |
| 1000 seed weight, g           | Taiwan 1984   | 0.6248      | 38.3053   | <.0001*   | 0.9979           | -0.8380         | -0.1340         | A,C,B              |
| Seed yield per plant, g       | Pakistan 2015 | 0.4666      | 20.1225   | <.0001*   | -0.6210          | 0.8752          | -0.3712         | B,A,B              |
| Seeds per pod                 | Pakistan 2015 | 0.1300      | 3.4372    | 0.0406*   | -0.4875          | 0.2418          | 0.2806          | A,A,A              |
| Seeds per pod                 | Taiwan 1984   | 0.1611      | 4.4168    | 0.0176*   | 0.1413           | 0.3386          | -0.6107         | AB,A,B             |
| <b>Plant size:</b>            |               |             |           |           |                  |                 |                 |                    |
| Petiole length, cm            | Pakistan 2015 | 0.2943      | 9.5907    | 0.0003*   | 0.5435           | 0.0878          | -0.7798         | A,A,B              |
| Plant height, cm              | Pakistan 2015 | 0.0001      | 0.0024    | 0.9976    | 0.0075           | 0.0055          | -0.0158         | A,A,A              |
| Plant height at flowering, cm | Taiwan 1984   | 0.3981      | 15.2115   | <.0001*   | 0.4811           | 0.3024          | -0.9705         | A,A,B              |
| Plant height at maturity, cm  | Taiwan 1984   | 0.5472      | 27.8000   | <.0001*   | 0.3480           | 0.5605          | -1.1362         | A,A,B              |
| Primary leaf length, cm       | Taiwan 1984   | 0.5454      | 27.5930   | <.0001*   | 0.9813           | -0.4212         | -0.6253         | A,B,B              |
| Primary leaf width, cm        | Taiwan 1984   | 0.6053      | 35.2773   | <.0001*   | 1.0244           | -0.6010         | -0.4313         | A,B,B              |
| Terminal leaflet length, cm   | Pakistan 2015 | 0.2186      | 6.4340    | 0.0034*   | 0.3062           | 0.2643          | -0.7167         | A,A,B              |
| Terminal leaflet width, cm    | Pakistan 2015 | 0.1680      | 4.6458    | 0.0145*   | 0.4361           | 0.0387          | -0.5734         | A,AB,B             |
| <b>Drought (PEG6000):</b>     |               |             |           |           |                  |                 |                 |                    |

|                                     |          |        |         |         |         |         |         |       |
|-------------------------------------|----------|--------|---------|---------|---------|---------|---------|-------|
| Shoot dry weight (SDW), mg          | NTU 2021 | 0.5998 | 36.7246 | <.0001* | 1.0508  | -0.5607 | -0.5483 | A,B,B |
| Root dry weight (RDW), mg           | NTU 2021 | 0.5964 | 36.2048 | <.0001* | 1.0299  | -0.6933 | -0.3336 | A,B,B |
| Total dry weight (TDW), mg          | NTU 2021 | 0.5934 | 35.7555 | <.0001* | 1.0448  | -0.5883 | -0.5028 | A,B,B |
| Root:Shoot ratio dry weight (RSRDW) | NTU 2021 | 0.3261 | 11.8577 | <.0001* | -0.2316 | -0.4342 | 0.9112  | B,B,A |
| <b>Drought (Control):</b>           |          |        |         |         |         |         |         |       |
| Shoot dry weight (SDW), mg          | NTU 2021 | 0.5779 | 33.5453 | <.0001* | 1.0275  | -0.4709 | -0.6484 | A,B,B |
| Root dry weight (RDW), mg           | NTU 2021 | 0.5205 | 26.5962 | <.0001* | 0.9716  | -0.6077 | -0.3811 | A,B,B |
| Total dry weight (TDW), mg          | NTU 2021 | 0.5638 | 31.6722 | <.0001* | 1.0195  | -0.5374 | -0.5430 | A,B,B |
| Root:Shoot ratio dry weight (RSRDW) | NTU 2021 | 0.1753 | 5.2083  | 0.0089* | -0.3036 | -0.2004 | 0.6773  | B,B,A |

860 \*Significant at  $P < 0.05$ ; 1: least-square means of each group after inverse normal transformation of raw data; 2: levels not connected  
861 by same letter are significantly different.

862

863 **Supplementary file 9.** Mean of eight independent bioclimatic variables of the genetic groups

864

| <b>Bioclimatic variable</b> | <b>Northeast Asia</b> | <b>Northwest Asia</b> | <b>Southeast Asia</b> | <b>South Asia</b> | <b>Central Asia</b> |
|-----------------------------|-----------------------|-----------------------|-----------------------|-------------------|---------------------|
|                             | <b>(N = 37)</b>       | <b>(N = 45)</b>       | <b>(N = 45)</b>       | <b>(N = 49)</b>   | <b>(N = 72)</b>     |
|                             | <b>Mean ± SD</b>      | <b>Mean ± SD</b>      | <b>Mean ± SD</b>      | <b>Mean ± SD</b>  | <b>Mean ± SD</b>    |
| <b>Bio1</b>                 | 62.49 ± 55.39         | 117.58 ± 54.30        | 256.47 ± 19.29        | 255.57 ± 14.80    | 128.72 ± 41.10      |
| <b>Bio2</b>                 | 115.22 ± 15.44        | 124.38 ± 20.14        | 102.02 ± 16.11        | 127.24 ± 16.12    | 130.08 ± 13.89      |
| <b>Bio3</b>                 | 25.14 ± 2.04          | 31.02 ± 4.47          | 51.58 ± 7.19          | 42.8 ± 4.58       | 32.4 ± 3.52         |
| <b>Bio8</b>                 | 207.86 ± 31.97        | 107.89 ± 67.90        | 271.47 ± 11.68        | 283.92 ± 23.02    | 92.04 ± 42.23       |
| <b>Bio12</b>                | 821.59 ± 299.98       | 301.24 ± 201.00       | 1477.69 ± 380.18      | 750.39 ± 329.19   | 285.67 ± 145.24     |
| <b>Bio14</b>                | 12.14 ± 11.72         | 5.18 ± 8.99           | 6.33 ± 4.34           | 2.47 ± 3.44       | 2.51 ± 4.98         |
| <b>Bio15</b>                | 95.35 ± 24.52         | 65.4 ± 20.35          | 84.78 ± 7.25          | 124.47 ± 23.48    | 70.92 ± 12.92       |
| <b>Bio19</b>                | 42.51 ± 38.23         | 88.33 ± 67.16         | 48.02 ± 24.91         | 34 ± 33.99        | 92.15 ± 45.19       |

865
